# Supplementary material for: Circulating inflammatory proteins associate with response to immune checkpoint inhibition therapy in patients with advanced melanoma
Source: PubMed Central journal article supplement (PMC9421308; doi:10.1016/j.ebiom.2022.104235), 2022-08-22
Supplement: mmc1.pdf [file mmc1.pdf]

## Supplementary material for

### Circulating inflammatory proteins associate with response to immune checkpoint inhibition therapy in patients with advanced melanoma

Niccolò Rossi PhD<sup>1\*</sup>, Karla A. Lee MD<sup>1\*</sup>, Maria V. Bermudez BSc.<sup>2</sup>, Alessia Visconti PhD<sup>1</sup>, Andrew Maltez Thomas PhD<sup>3</sup>, Laura A. Bolte BSc<sup>4</sup>, Johannes R. Björk PhD<sup>4</sup>, Laura Kist de Ruijter MD<sup>5</sup>, Julia Newton-Bishop MB MD<sup>6</sup>, Mark Harland PhD<sup>6</sup>, Heather M. Shaw MD PhD<sup>7</sup>, Mark Harries MD PhD<sup>8</sup>, Joseph Sacco MD PhD<sup>9</sup>, Ruth Board MD PhD<sup>10</sup>, Paul Lorigan MD<sup>11,12</sup>, Elisabeth G. E. de Vries MD PhD<sup>5</sup>, Nicola Segata PhD<sup>3</sup>, Leonie S. Taams PhD<sup>2</sup>, Sophie Papa MD PhD<sup>13,8</sup>, Tim D. Spector MB MD<sup>1</sup>, Paul Nathan MD PhD<sup>7</sup>, Rinse K. Weersma MD PhD<sup>4</sup>, Geke A. P. Hospers MD PhD<sup>5</sup>, Rudolf S.N. Fehrmann MD PhD<sup>5</sup>, Veronique Bataille MD PhD<sup>1,7§</sup>, Mario Falchi PhD<sup>1§</sup>

1. Department of Twin Research and Genetic Epidemiology, King's College London, U.K.
2. Centre for Inflammation Biology and Cancer Immunology, King's College London, U.K.
3. Department CIBIO, University of Trento, Trento, Italy.
4. Department of Gastroenterology and Hepatology University of Groningen and University Medical Center Groningen, the Netherlands
5. Department of Medical Oncology, University of Groningen, University Medical Center Groningen, the Netherlands
6. Division of Haematology and Immunology, Institute of Medical Research at St James's, University of Leeds, U.K.
7. Department of Medical Oncology, Mount Vernon Cancer Centre, Northwood, U.K.
8. Department of Medical Oncology, Guy's and St Thomas' NHS Foundation Trust, London, U.K.
9. Liverpool Clatterbridge Cancer Centre, Liverpool, U.K.
10. Department of Oncology, Lancashire Teaching Hospitals NHS Trust, Preston, U.K.
11. The Christie NHS Foundation Trust, Manchester, U.K.
12. Division of Cancer Sciences, University of Manchester, U.K.
13. School of Cancer and Pharmaceutical Studies, King's College London, U.K.

\*Equal contribution

§Shared senior authorship

Corresponding authors e-mail: [mario.falchi@kcl.ac.uk](mailto:mario.falchi@kcl.ac.uk) [veronique.bataille@kcl.ac.uk](mailto:veronique.bataille@kcl.ac.uk)

## Supplementary Methods

### Study patients

PRIMM-UK (NCT03643289) is a prospective observational study recruiting patients across the UK. PRIMM-UK was sponsored by East & North Hertfordshire NHS Trust with an ethical approval from the South Central Berkshire committee of the Research Ethics Services (RES) of the NHS. LEEDS was recruited within a retrospective cohort study managed by the University of Leeds and named “Developing a Blood Test of Immunity in Illness: A study examining the peripheral blood transcriptome in patients with cancer, autoimmune disease, immunodeficiency or iatrogenic immune suppression” (REC Ref: 15/NW/0933). COLIPI (Identification of Predictive Parameters for Colitis in Melanoma Patients Treated With Immunotherapy), POINTING (towards patient -tailored cancer immunotherapy supported by a multifaceted predictive signature composed of integrative omics and molecular imaging), and OncoLifeS (Oncological Life Study) are three observational studies prospectively recruiting patients with melanoma from the Dutch population. OncoLifeS (METc number 2010/109), COLIPI (METc number 2012/085, NCT02600143) and POINTING (METc number 2018/350, NCT04193956) have all been approved by the Medical Ethical Committee (in Dutch: Medisch Ethische Toetsingscommissie or METc) of the University Medical Center Groningen (UMCG) in the Netherlands. OncoLifeS information is available on the Netherlands Trial Register: NTR: <https://www.trialregister.nl/trial/7839>. Written informed consent was obtained from all patients.

### Clinical evaluation

Collected clinical/demographic data used in this study include age at ICI initiation, sex, body mass index (BMI), BRAF mutation status, metastatic stage, lactate dehydrogenase (LDH) levels, Eastern Cooperative Oncology Group performance-status (ECOG-PS), and prescribed ICI regimen. LDH levels were dichotomized according to the upper limit of normal for each centre. Radiological evaluation, consisting of computed tomography (CT) scan of the chest, abdomen and pelvis and MRI of the brain, was performed before starting immunotherapy. A small number of patients underwent a combination of positron emission tomography (PET) and CT scan (PET-CT). Follow-up radiological evaluation was performed every 10–14 weeks as long as the patient received ICI therapy. Additional CT- and/or MRI scans were performed when there was suspicion of progression. If the first radiological evaluation after the start of treatment was inconclusive, a confirmatory scan was performed 4–12 weeks later.

### Sample collection

Venous blood samples were taken at the respective hospitals attended by the patients. Serum was obtained by centrifugation and stored at each site at  $-80^{\circ}\text{C}$  until shipping to King’s College London, where they were aliquoted for analysis. For each serum sample, 40  $\mu\text{L}$  was shipped by courier on dry ice to the clinical biomarkers’ facility OLINK at SciLifeLab (Uppsala, Sweden) in randomised 96-well plates for proteomic characterisation.

### Luminex assay

Validation of serum protein expression levels was performed using a custom Luminex assay (R&D systems, MN, USA). Serum samples ( $n=81$ ) were centrifuged at  $16,000 \times g$  for 4 minutes, then diluted two-fold and plated in duplicate. The assay was performed per manufacturer’s guidelines and acquired with a Luminex Flexmap3D. Protein concentrations were calculated using a standard curve for mean fluorescence intensity of each analyte against picograms/millilitre (pg/mL). Measures below or above the assay limits of detection ( $n=3$ , corresponding to 0.6% of the tested samples) were excluded. Samples showing extreme variation between duplicate measures (*i.e.*,  $>4$  SD from the protein sample mean) were removed ( $n_{\text{IL-6}}=1$ ,  $n_{\text{HGF}}=2$ , and  $n_{\text{MCP-2}}=2$ ), and concentrations from duplicate wells were averaged. Outliers, defined as those values deviating by more than four SD from the protein sample mean, were removed.

## Multivariate permutation

At each permutation iteration, proteins were randomly permuted as a single set, thereby preserving their natural correlations. We assessed the absolute test statistics (*i.e.*, absolute z-score) for each protein in each random dataset  $i$  ( $Z_i$ ), and used a step-down procedure to assess the significance of each association observed in the original dataset. The largest absolute test statistics from each permutation ( $Z_{i \max}$ ) was used to define the distribution of the test statistics under the null hypothesis ( $Z_0$ ). We selected the largest absolute test statistics across all observed associations ( $Z_{\max}$ ), and estimated an empirical p-value ( $p_{\text{emp}}$ ) as the probability of observing a z-score  $Z_0$  as or more extreme than the observed one ( $Z_{\max}$ ). If  $p_{\text{emp}}$  was  $<0.05$ , we considered the association significant, and its test statistics were removed from both the original and the random datasets. We repeated this procedure until  $p_{\text{emp}}$  became  $>0.05$ , and considered all remaining associations not significant.<sup>1</sup>

**Table S1.** Meta-analysis of the association between ORR and pre-treatment levels of 77 serum inflammatory proteins in 48 patients with advanced melanoma from the UK and 39 patients from the NL. Protein differences between responders and non-responders were supplied to a random-effects meta-analysis model using the restricted maximum-likelihood estimator. For each study centre, we report the mean difference (MD) of log<sub>2</sub>-scaled protein levels between responders (R) and non-responders (NR), and sampling variance ( $\sigma^2$ ). Meta-analysis statistics are shown, including the mean log<sub>2</sub>-FC (Summary effect), along with its lower (Lower) and upper (Upper) 95% CI bounds, p-value (p), and Bonferroni-corrected p-value (p<sub>adj</sub>), and the Cochran's Q test of heterogeneity statistics (QE) and p-value (p<sub>QE</sub>).

| Protein     | UK |    |       |            | NL |    |       |            | Summary effect | Lower | Upper | p                     | p <sub>adj</sub>      | QE   | p <sub>QE</sub>       |
|-------------|----|----|-------|------------|----|----|-------|------------|----------------|-------|-------|-----------------------|-----------------------|------|-----------------------|
|             | R  | NR | MD    | $\sigma^2$ | R  | NR | MD    | $\sigma^2$ |                |       |       |                       |                       |      |                       |
| HGF         | 23 | 24 | 0.41  | 0.02       | 23 | 16 | 0.41  | 0.02       | 0.41           | 0.19  | 0.63  | 2.29x10 <sup>-4</sup> | 9.62x10 <sup>-3</sup> | 0.00 | 1.00x10 <sup>0</sup>  |
| IL-6        | 23 | 25 | 0.96  | 0.10       | 23 | 16 | 0.79  | 0.18       | 0.90           | 0.41  | 1.39  | 3.31x10 <sup>-4</sup> | 1.39x10 <sup>-2</sup> | 0.10 | 7.56x10 <sup>-1</sup> |
| MCP-2       | 23 | 25 | 0.53  | 0.04       | 23 | 16 | 0.43  | 0.04       | 0.48           | 0.19  | 0.76  | 1.02x10 <sup>-3</sup> | 4.28x10 <sup>-2</sup> | 0.11 | 7.41x10 <sup>-1</sup> |
| IL-18R1     | 23 | 25 | 0.33  | 0.02       | 23 | 16 | 0.29  | 0.02       | 0.32           | 0.12  | 0.51  | 1.56x10 <sup>-3</sup> | >0.05                 | 0.04 | 8.33x10 <sup>-1</sup> |
| CCL4        | 23 | 25 | 0.34  | 0.04       | 23 | 16 | 0.47  | 0.03       | 0.41           | 0.15  | 0.67  | 2.11x10 <sup>-3</sup> | >0.05                 | 0.22 | 6.36x10 <sup>-1</sup> |
| CSF-1       | 23 | 25 | 0.10  | 0.00       | 23 | 16 | 0.20  | 0.00       | 0.15           | 0.05  | 0.24  | 2.28x10 <sup>-3</sup> | >0.05                 | 1.01 | 3.15x10 <sup>-1</sup> |
| IL-17A      | 22 | 23 | 0.30  | 0.02       | 23 | 14 | 0.57  | 0.06       | 0.37           | 0.12  | 0.62  | 3.36x10 <sup>-3</sup> | >0.05                 | 0.95 | 3.30x10 <sup>-1</sup> |
| TNF         | 23 | 25 | 0.55  | 0.04       | 23 | 16 | 0.26  | 0.05       | 0.42           | 0.12  | 0.72  | 6.04x10 <sup>-3</sup> | >0.05                 | 0.91 | 3.41x10 <sup>-1</sup> |
| CCL20       | 23 | 25 | 0.42  | 0.09       | 23 | 15 | 0.60  | 0.07       | 0.53           | 0.15  | 0.91  | 6.83x10 <sup>-3</sup> | >0.05                 | 0.22 | 6.38x10 <sup>-1</sup> |
| PD-L1       | 23 | 25 | 0.19  | 0.02       | 23 | 16 | 0.27  | 0.01       | 0.23           | 0.06  | 0.41  | 7.21x10 <sup>-3</sup> | >0.05                 | 0.19 | 6.61x10 <sup>-1</sup> |
| FGF-21      | 23 | 25 | 0.47  | 0.13       | 23 | 16 | 1.01  | 0.16       | 0.71           | 0.18  | 1.24  | 8.36x10 <sup>-3</sup> | >0.05                 | 1.02 | 3.13x10 <sup>-1</sup> |
| LIF-R       | 23 | 25 | 0.11  | 0.01       | 23 | 16 | 0.20  | 0.01       | 0.16           | 0.04  | 0.28  | 8.57x10 <sup>-3</sup> | >0.05                 | 0.50 | 4.79x10 <sup>-1</sup> |
| CDCP1       | 23 | 25 | 0.33  | 0.03       | 23 | 16 | 0.36  | 0.04       | 0.34           | 0.09  | 0.60  | 8.93x10 <sup>-3</sup> | >0.05                 | 0.01 | 9.15x10 <sup>-1</sup> |
| OSM         | 23 | 25 | 0.57  | 0.09       | 23 | 16 | 0.51  | 0.08       | 0.54           | 0.14  | 0.95  | 9.09x10 <sup>-3</sup> | >0.05                 | 0.02 | 8.85x10 <sup>-1</sup> |
| CCL3        | 23 | 24 | 0.44  | 0.08       | 23 | 16 | 0.47  | 0.06       | 0.46           | 0.10  | 0.82  | 1.31x10 <sup>-2</sup> | >0.05                 | 0.01 | 9.22x10 <sup>-1</sup> |
| CXCL11      | 23 | 25 | 0.63  | 0.08       | 23 | 16 | 0.35  | 0.10       | 0.51           | 0.09  | 0.92  | 1.77x10 <sup>-2</sup> | >0.05                 | 0.44 | 5.07x10 <sup>-1</sup> |
| LAP (TGFB1) | 23 | 25 | 0.19  | 0.02       | 23 | 16 | 0.30  | 0.02       | 0.24           | 0.04  | 0.44  | 1.94x10 <sup>-2</sup> | >0.05                 | 0.30 | 5.81x10 <sup>-1</sup> |
| uPA         | 23 | 25 | 0.18  | 0.01       | 23 | 16 | 0.14  | 0.01       | 0.15           | 0.02  | 0.28  | 2.09x10 <sup>-2</sup> | >0.05                 | 0.12 | 7.29x10 <sup>-1</sup> |
| CXCL1       | 23 | 25 | 0.24  | 0.02       | 23 | 16 | 0.28  | 0.03       | 0.26           | 0.04  | 0.48  | 2.27x10 <sup>-2</sup> | >0.05                 | 0.02 | 8.86x10 <sup>-1</sup> |
| IL-8        | 23 | 25 | 0.65  | 0.10       | 23 | 15 | 0.38  | 0.12       | 0.52           | 0.07  | 0.98  | 2.49x10 <sup>-2</sup> | >0.05                 | 0.33 | 5.63x10 <sup>-1</sup> |
| ADA         | 23 | 25 | 0.21  | 0.01       | 23 | 16 | 0.24  | 0.03       | 0.22           | 0.02  | 0.41  | 2.68x10 <sup>-2</sup> | >0.05                 | 0.02 | 8.78x10 <sup>-1</sup> |
| CCL23       | 23 | 25 | 0.24  | 0.02       | 23 | 16 | 0.28  | 0.03       | 0.25           | 0.03  | 0.48  | 2.85x10 <sup>-2</sup> | >0.05                 | 0.03 | 8.53x10 <sup>-1</sup> |
| TNFRSF9     | 23 | 25 | 0.17  | 0.02       | 23 | 16 | 0.24  | 0.02       | 0.21           | 0.01  | 0.41  | 3.77x10 <sup>-2</sup> | >0.05                 | 0.15 | 7.02x10 <sup>-1</sup> |
| VEGFA       | 23 | 25 | 0.27  | 0.03       | 23 | 16 | 0.26  | 0.04       | 0.27           | 0.01  | 0.52  | 4.09x10 <sup>-2</sup> | >0.05                 | 0.00 | 9.76x10 <sup>-1</sup> |
| CD40        | 23 | 25 | 0.14  | 0.01       | 23 | 16 | 0.22  | 0.02       | 0.17           | 0.01  | 0.34  | 4.14x10 <sup>-2</sup> | >0.05                 | 0.19 | 6.59x10 <sup>-1</sup> |
| IL-18       | 23 | 25 | 0.25  | 0.03       | 23 | 16 | 0.68  | 0.07       | 0.42           | 0.00  | 0.83  | 4.77x10 <sup>-2</sup> | >0.05                 | 1.83 | 1.76x10 <sup>-1</sup> |
| IL-7        | 23 | 25 | 0.34  | 0.03       | 23 | 16 | 0.16  | 0.03       | 0.25           | 0.00  | 0.50  | 5.07x10 <sup>-2</sup> | >0.05                 | 0.49 | 4.82x10 <sup>-1</sup> |
| OPG         | 23 | 25 | 0.15  | 0.02       | 23 | 16 | 0.24  | 0.02       | 0.19           | -0.01 | 0.38  | 5.74x10 <sup>-2</sup> | >0.05                 | 0.22 | 6.42x10 <sup>-1</sup> |
| MCP-3       | 23 | 25 | 0.46  | 0.06       | 23 | 15 | 0.18  | 0.04       | 0.29           | -0.02 | 0.59  | 6.67x10 <sup>-2</sup> | >0.05                 | 0.78 | 3.78x10 <sup>-1</sup> |
| IL-10       | 23 | 25 | 0.31  | 0.04       | 23 | 16 | 0.26  | 0.12       | 0.30           | -0.02 | 0.62  | 6.76x10 <sup>-2</sup> | >0.05                 | 0.02 | 8.82x10 <sup>-1</sup> |
| CXCL10      | 23 | 25 | 0.45  | 0.07       | 23 | 16 | 0.26  | 0.11       | 0.37           | -0.04 | 0.79  | 7.75x10 <sup>-2</sup> | >0.05                 | 0.21 | 6.50x10 <sup>-1</sup> |
| SCF         | 23 | 25 | -0.18 | 0.03       | 23 | 16 | -0.37 | 0.05       | -0.25          | -0.53 | 0.03  | 7.76x10 <sup>-2</sup> | >0.05                 | 0.40 | 5.28x10 <sup>-1</sup> |
| IL-15RA     | 23 | 25 | 0.05  | 0.01       | 23 | 16 | 0.21  | 0.01       | 0.13           | -0.03 | 0.29  | 1.02x10 <sup>-1</sup> | >0.05                 | 1.58 | 2.09x10 <sup>-1</sup> |
| SLAMF1      | 23 | 25 | 0.06  | 0.02       | 23 | 16 | 0.19  | 0.01       | 0.13           | -0.03 | 0.30  | 1.11x10 <sup>-1</sup> | >0.05                 | 0.55 | 4.58x10 <sup>-1</sup> |
| CD8A        | 23 | 25 | 0.29  | 0.05       | 23 | 16 | 0.23  | 0.07       | 0.27           | -0.07 | 0.60  | 1.16x10 <sup>-1</sup> | >0.05                 | 0.03 | 8.64x10 <sup>-1</sup> |
| CD5         | 23 | 25 | 0.10  | 0.02       | 23 | 16 | 0.14  | 0.01       | 0.12           | -0.04 | 0.29  | 1.46x10 <sup>-1</sup> | >0.05                 | 0.04 | 8.40x10 <sup>-1</sup> |
| IL-12B      | 23 | 25 | 0.27  | 0.04       | 23 | 16 | 0.14  | 0.08       | 0.23           | -0.09 | 0.56  | 1.60x10 <sup>-1</sup> | >0.05                 | 0.14 | 7.13x10 <sup>-1</sup> |
| TNFSF14     | 23 | 25 | 0.21  | 0.07       | 23 | 16 | 0.27  | 0.06       | 0.25           | -0.11 | 0.60  | 1.70x10 <sup>-1</sup> | >0.05                 | 0.03 | 8.72x10 <sup>-1</sup> |
| CXCL6       | 23 | 25 | 0.08  | 0.03       | 23 | 16 | 0.29  | 0.04       | 0.17           | -0.07 | 0.42  | 1.70x10 <sup>-1</sup> | >0.05                 | 0.68 | 4.09x10 <sup>-1</sup> |

|         |    |    |       |      |    |    |       |      |       |       |      |                       |       |      |                       |
|---------|----|----|-------|------|----|----|-------|------|-------|-------|------|-----------------------|-------|------|-----------------------|
| GNDF    | 23 | 25 | 0.13  | 0.02 | 22 | 16 | 0.10  | 0.03 | 0.12  | -0.08 | 0.33 | 2.38x10 <sup>-1</sup> | >0.05 | 0.02 | 8.88x10 <sup>-1</sup> |
| TRANCE  | 23 | 25 | -0.21 | 0.06 | 23 | 16 | -0.23 | 0.09 | -0.22 | -0.59 | 0.16 | 2.54x10 <sup>-1</sup> | >0.05 | 0.00 | 9.51x10 <sup>-1</sup> |
| IFN-γ   | 23 | 24 | 0.23  | 0.09 | 23 | 16 | 0.84  | 0.57 | 0.32  | -0.24 | 0.88 | 2.66x10 <sup>-1</sup> | >0.05 | 0.57 | 4.49x10 <sup>-1</sup> |
| AXIN1   | 23 | 25 | -0.07 | 0.10 | 23 | 16 | 0.30  | 0.04 | 0.19  | -0.16 | 0.53 | 2.91x10 <sup>-1</sup> | >0.05 | 0.90 | 3.44x10 <sup>-1</sup> |
| IL-17C  | 22 | 25 | 0.13  | 0.05 | 23 | 16 | 0.19  | 0.05 | 0.16  | -0.15 | 0.47 | 3.10x10 <sup>-1</sup> | >0.05 | 0.03 | 8.63x10 <sup>-1</sup> |
| CXCL9   | 23 | 25 | 0.29  | 0.08 | 23 | 16 | 0.10  | 0.16 | 0.23  | -0.22 | 0.67 | 3.18x10 <sup>-1</sup> | >0.05 | 0.16 | 6.93x10 <sup>-1</sup> |
| IL-20RA | 22 | 20 | 0.01  | 0.01 | 21 | 16 | 0.23  | 0.02 | 0.11  | -0.10 | 0.32 | 3.20x10 <sup>-1</sup> | >0.05 | 1.85 | 1.74x10 <sup>-1</sup> |
| NT-3    | 23 | 24 | 0.16  | 0.02 | 23 | 16 | 0.01  | 0.02 | 0.09  | -0.09 | 0.26 | 3.28x10 <sup>-1</sup> | >0.05 | 0.66 | 4.16x10 <sup>-1</sup> |
| CD244   | 23 | 25 | 0.06  | 0.01 | 23 | 16 | 0.10  | 0.01 | 0.08  | -0.08 | 0.24 | 3.45x10 <sup>-1</sup> | >0.05 | 0.05 | 8.28x10 <sup>-1</sup> |
| DNER    | 23 | 25 | 0.08  | 0.02 | 23 | 16 | 0.08  | 0.02 | 0.08  | -0.10 | 0.25 | 3.78x10 <sup>-1</sup> | >0.05 | 0.00 | 9.91x10 <sup>-1</sup> |
| MMP-10  | 23 | 24 | 0.24  | 0.04 | 23 | 16 | -0.02 | 0.04 | 0.12  | -0.16 | 0.40 | 4.10x10 <sup>-1</sup> | >0.05 | 0.86 | 3.54x10 <sup>-1</sup> |
| IL-10RB | 23 | 24 | -0.02 | 0.01 | 23 | 16 | 0.14  | 0.01 | 0.06  | -0.10 | 0.22 | 4.35x10 <sup>-1</sup> | >0.05 | 1.89 | 1.69x10 <sup>-1</sup> |
| FGF-19  | 23 | 25 | 0.02  | 0.05 | 23 | 16 | -0.41 | 0.08 | -0.16 | -0.58 | 0.26 | 4.60x10 <sup>-1</sup> | >0.05 | 1.46 | 2.26x10 <sup>-1</sup> |
| MCP-1   | 23 | 25 | -0.07 | 0.03 | 23 | 16 | 0.47  | 0.03 | 0.20  | -0.33 | 0.73 | 4.61x10 <sup>-1</sup> | >0.05 | 5.38 | 2.03x10 <sup>-2</sup> |
| TGF-α   | 23 | 24 | 0.20  | 0.07 | 23 | 16 | 0.08  | 0.05 | 0.13  | -0.22 | 0.47 | 4.63x10 <sup>-1</sup> | >0.05 | 0.11 | 7.41x10 <sup>-1</sup> |
| CXCL5   | 23 | 25 | -0.04 | 0.06 | 23 | 16 | -0.23 | 0.07 | -0.13 | -0.48 | 0.22 | 4.68x10 <sup>-1</sup> | >0.05 | 0.31 | 5.79x10 <sup>-1</sup> |
| SIRT2   | 23 | 25 | 0.14  | 0.07 | 23 | 16 | 0.11  | 0.06 | 0.12  | -0.23 | 0.48 | 4.96x10 <sup>-1</sup> | >0.05 | 0.01 | 9.35x10 <sup>-1</sup> |
| IL-10RA | 23 | 23 | 0.31  | 0.05 | 20 | 16 | -0.01 | 0.02 | 0.11  | -0.20 | 0.41 | 5.00x10 <sup>-1</sup> | >0.05 | 1.67 | 1.97x10 <sup>-1</sup> |
| CCL19   | 23 | 25 | -0.01 | 0.05 | 23 | 16 | 0.50  | 0.13 | 0.16  | -0.31 | 0.62 | 5.05x10 <sup>-1</sup> | >0.05 | 1.41 | 2.35x10 <sup>-1</sup> |
| TNFB    | 23 | 25 | -0.01 | 0.02 | 23 | 16 | 0.16  | 0.02 | 0.07  | -0.13 | 0.26 | 5.16x10 <sup>-1</sup> | >0.05 | 0.64 | 4.24x10 <sup>-1</sup> |
| ST1A1   | 23 | 23 | -0.18 | 0.14 | 23 | 16 | 0.61  | 0.10 | 0.24  | -0.53 | 1.01 | 5.39x10 <sup>-1</sup> | >0.05 | 2.51 | 1.13x10 <sup>-1</sup> |
| STAMBP  | 23 | 25 | 0.09  | 0.04 | 23 | 16 | 0.06  | 0.03 | 0.07  | -0.19 | 0.33 | 5.97x10 <sup>-1</sup> | >0.05 | 0.01 | 9.14x10 <sup>-1</sup> |
| CCL25   | 23 | 25 | -0.14 | 0.04 | 23 | 16 | -0.02 | 0.02 | -0.06 | -0.29 | 0.17 | 5.98x10 <sup>-1</sup> | >0.05 | 0.26 | 6.08x10 <sup>-1</sup> |
| EN-RAGE | 23 | 25 | 0.09  | 0.11 | 23 | 16 | 0.11  | 0.06 | 0.10  | -0.29 | 0.49 | 6.11x10 <sup>-1</sup> | >0.05 | 0.00 | 9.59x10 <sup>-1</sup> |
| CCL28   | 23 | 25 | 0.25  | 0.01 | 23 | 16 | -0.08 | 0.01 | 0.08  | -0.24 | 0.41 | 6.22x10 <sup>-1</sup> | >0.05 | 3.98 | 4.61x10 <sup>-2</sup> |
| TRAIL   | 23 | 25 | 0.08  | 0.01 | 23 | 16 | -0.01 | 0.01 | 0.03  | -0.10 | 0.17 | 6.40x10 <sup>-1</sup> | >0.05 | 0.49 | 4.85x10 <sup>-1</sup> |
| MCP-4   | 23 | 25 | -0.16 | 0.05 | 23 | 16 | 0.01  | 0.05 | -0.07 | -0.38 | 0.24 | 6.50x10 <sup>-1</sup> | >0.05 | 0.28 | 5.95x10 <sup>-1</sup> |
| CASP-8  | 23 | 25 | -0.01 | 0.05 | 23 | 16 | 0.24  | 0.09 | 0.08  | -0.27 | 0.43 | 6.59x10 <sup>-1</sup> | >0.05 | 0.44 | 5.06x10 <sup>-1</sup> |
| CCL11   | 23 | 25 | 0.09  | 0.03 | 23 | 16 | 0.01  | 0.02 | 0.04  | -0.16 | 0.25 | 6.64x10 <sup>-1</sup> | >0.05 | 0.14 | 7.10x10 <sup>-1</sup> |
| TWEAK   | 23 | 25 | 0.02  | 0.01 | 23 | 16 | 0.06  | 0.02 | 0.04  | -0.13 | 0.21 | 6.73x10 <sup>-1</sup> | >0.05 | 0.05 | 8.23x10 <sup>-1</sup> |
| CX3CL1  | 23 | 25 | 0.05  | 0.01 | 23 | 16 | 0.02  | 0.02 | 0.03  | -0.14 | 0.21 | 7.03x10 <sup>-1</sup> | >0.05 | 0.03 | 8.63x10 <sup>-1</sup> |
| CST5    | 23 | 25 | 0.00  | 0.03 | 23 | 16 | -0.07 | 0.02 | -0.04 | -0.27 | 0.18 | 7.05x10 <sup>-1</sup> | >0.05 | 0.09 | 7.60x10 <sup>-1</sup> |
| MMP-1   | 23 | 25 | 0.04  | 0.04 | 22 | 16 | 0.07  | 0.05 | 0.05  | -0.24 | 0.35 | 7.30x10 <sup>-1</sup> | >0.05 | 0.01 | 9.24x10 <sup>-1</sup> |
| FGF-23  | 22 | 23 | -0.08 | 0.02 | 22 | 16 | 0.17  | 0.03 | 0.03  | -0.21 | 0.28 | 7.81x10 <sup>-1</sup> | >0.05 | 1.27 | 2.59x10 <sup>-1</sup> |
| CD6     | 23 | 25 | 0.07  | 0.03 | 23 | 16 | 0.00  | 0.03 | 0.03  | -0.22 | 0.28 | 8.16x10 <sup>-1</sup> | >0.05 | 0.09 | 7.70x10 <sup>-1</sup> |
| FGF-5   | 23 | 24 | 0.10  | 0.01 | 23 | 16 | -0.13 | 0.01 | 0.00  | -0.22 | 0.22 | 9.81x10 <sup>-1</sup> | >0.05 | 2.26 | 1.32x10 <sup>-1</sup> |
| 4E-BP1  | 23 | 25 | 0.36  | 0.15 | 23 | 16 | -0.35 | 0.15 | 0.01  | -0.69 | 0.70 | 9.86x10 <sup>-1</sup> | >0.05 | 1.69 | 1.94x10 <sup>-1</sup> |
| Flt3L   | 23 | 25 | -0.13 | 0.02 | 23 | 16 | 0.19  | 0.04 | 0.00  | -0.31 | 0.31 | 9.93x10 <sup>-1</sup> | >0.05 | 1.70 | 1.93x10 <sup>-1</sup> |

**Table S2.** Association between ORR and pre-treatment levels of IL-6, HGF, and MCP-2 measured through Luminex. Protein differences between 41 responders and 40 non-responders were assessed using Wilcoxon’s test ( $p_{\text{Wilcoxon}}$ ). Median, lower (Q1) and upper (Q3) quartiles of protein levels (pg/mL) among responders and non-responders are shown. Odds ratios (ORs) and p-values ( $p_{\text{regression}}$ ) were estimated using logistic regression, while 95% CIs were estimated via bootstrapping. Age, sex, BMI, and metastatic stage were included as covariates in the model.

| Protein | Responders |        |        |        | Non-Responders |        |        |        | mean FC | $p_{\text{Wilcoxon}}$ | OR   | 95% CI    | $p_{\text{regression}}$ |
|---------|------------|--------|--------|--------|----------------|--------|--------|--------|---------|-----------------------|------|-----------|-------------------------|
|         | N          | median | Q1     | Q3     | N              | median | Q1     | Q3     |         |                       |      |           |                         |
| IL-6    | 41         | 1·14   | 0·79   | 1·83   | 39             | 1·71   | 1·28   | 3·81   | 2·46    | $1·44 \times 10^{-3}$ | 0·76 | 0·32-0·90 | $7·70 \times 10^{-3}$   |
| HGF     | 41         | 170·03 | 132·13 | 213·32 | 37             | 224·44 | 171·67 | 294·58 | 1·36    | $8·75 \times 10^{-3}$ | 0·99 | 0·97-0·99 | $2·78 \times 10^{-3}$   |
| MCP-2   | 39         | 47·41  | 34·37  | 59·50  | 39             | 59·52  | 48·52  | 79·77  | 1·32    | $2·15 \times 10^{-3}$ | 0·97 | 0·93-1·00 | $3·85 \times 10^{-2}$   |

**Table S3.** Protein changes from baseline at early (2-5 weeks after ICI initiation) and late (5-12 weeks after ICI initiation) follow-up visits. Protein changes were assessed on Olink data in 46 and 35 patients with advanced melanoma at early and late follow-up time windows, respectively, using a two-sided Wilcoxon test for paired data (p). Median change of log<sub>2</sub>-scaled protein levels, along with the lower (Q1) and upper (Q3) quartiles, are shown. A Wilcoxon empirical p-value (p<sub>emp</sub>) was determined using multivariate permutation.

| Protein | Early follow-up window |        |       |      |                        |                       | Late follow-up window |        |       |      |                       |                       |
|---------|------------------------|--------|-------|------|------------------------|-----------------------|-----------------------|--------|-------|------|-----------------------|-----------------------|
|         | N                      | median | Q1    | Q3   | p                      | p <sub>emp</sub>      | N                     | median | Q1    | Q3   | p                     | p <sub>emp</sub>      |
| TNFRSF9 | 45                     | 0.49   | 0.25  | 0.77 | 1.57x10 <sup>-10</sup> | 2.84x10 <sup>-2</sup> | 35                    | 0.45   | 0.18  | 0.68 | 3.34x10 <sup>-7</sup> | >0.05                 |
| CXCL9   | 46                     | 1.09   | 0.39  | 1.90 | 5.81x10 <sup>-8</sup>  | 4.12x10 <sup>-2</sup> | 35                    | 1.31   | 0.53  | 1.81 | 5.26x10 <sup>-8</sup> | 4.04x10 <sup>-2</sup> |
| IL-10   | 46                     | 0.63   | 0.20  | 1.13 | 2.93x10 <sup>-7</sup>  | >0.05                 | 35                    | 0.55   | 0.14  | 0.91 | 2.87x10 <sup>-5</sup> | >0.05                 |
| CXCL11  | 46                     | 0.69   | 0.23  | 1.31 | 5.10x10 <sup>-7</sup>  | >0.05                 | 35                    | 0.45   | 0.19  | 1.31 | 1.61x10 <sup>-5</sup> | >0.05                 |
| CCL19   | 46                     | 0.46   | 0.20  | 1.12 | 5.51x10 <sup>-7</sup>  | >0.05                 | 35                    | 0.21   | -0.23 | 0.91 | 1.31x10 <sup>-1</sup> | >0.05                 |
| CD5     | 46                     | 0.28   | 0.06  | 0.52 | 1.26x10 <sup>-6</sup>  | >0.05                 | 35                    | 0.34   | 0.09  | 0.60 | 5.05x10 <sup>-7</sup> | >0.05                 |
| IL-12B  | 46                     | 0.41   | 0.13  | 0.74 | 1.02x10 <sup>-5</sup>  | >0.05                 | 35                    | 0.35   | 0.10  | 0.87 | 6.65x10 <sup>-3</sup> | >0.05                 |
| CXCL10  | 46                     | 0.77   | 0.20  | 1.50 | 1.23x10 <sup>-5</sup>  | >0.05                 | 35                    | 0.71   | 0.19  | 1.50 | 5.45x10 <sup>-5</sup> | >0.05                 |
| MCP-3   | 46                     | 0.38   | 0.07  | 0.74 | 2.26x10 <sup>-5</sup>  | >0.05                 | 35                    | 0.12   | -0.25 | 0.73 | 8.10x10 <sup>-2</sup> | >0.05                 |
| IL-15RA | 45                     | 0.19   | 0.01  | 0.33 | 2.68x10 <sup>-5</sup>  | >0.05                 | 35                    | 0.20   | 0.06  | 0.39 | 9.74x10 <sup>-7</sup> | >0.05                 |
| TNFB    | 46                     | 0.25   | 0.04  | 0.36 | 7.43x10 <sup>-5</sup>  | >0.05                 | 35                    | 0.24   | 0.01  | 0.39 | 5.97x10 <sup>-3</sup> | >0.05                 |
| IL-17A  | 44                     | 0.36   | 0.07  | 0.63 | 8.18x10 <sup>-5</sup>  | >0.05                 | 33                    | 0.31   | -0.12 | 0.70 | 1.44x10 <sup>-2</sup> | >0.05                 |
| IFN-γ   | 46                     | 0.95   | 0.11  | 1.77 | 9.71x10 <sup>-5</sup>  | >0.05                 | 35                    | 0.49   | -0.78 | 0.89 | 4.13x10 <sup>-1</sup> | >0.05                 |
| OSM     | 46                     | 0.48   | 0.14  | 0.88 | 1.47x10 <sup>-4</sup>  | >0.05                 | 35                    | 0.12   | -0.59 | 0.77 | 2.73x10 <sup>-1</sup> | >0.05                 |
| PD-L1   | 46                     | 0.22   | -0.06 | 0.48 | 1.99x10 <sup>-4</sup>  | >0.05                 | 35                    | 0.16   | -0.04 | 0.39 | 2.63x10 <sup>-2</sup> | >0.05                 |
| Fc3L    | 46                     | 0.19   | 0.01  | 0.49 | 2.68x10 <sup>-4</sup>  | >0.05                 | 35                    | 0.14   | -0.33 | 0.42 | 5.65x10 <sup>-1</sup> | >0.05                 |
| CXCL1   | 46                     | 0.19   | 0.00  | 0.35 | 3.10x10 <sup>-4</sup>  | >0.05                 | 35                    | 0.12   | -0.17 | 0.35 | 1.27x10 <sup>-1</sup> | >0.05                 |
| TNF     | 45                     | 0.29   | -0.02 | 0.75 | 4.06x10 <sup>-4</sup>  | >0.05                 | 35                    | 0.18   | -0.14 | 0.65 | 1.91x10 <sup>-2</sup> | >0.05                 |
| IL-10RB | 44                     | 0.13   | -0.01 | 0.20 | 8.58x10 <sup>-4</sup>  | >0.05                 | 34                    | 0.08   | -0.02 | 0.20 | 1.31x10 <sup>-2</sup> | >0.05                 |
| CD6     | 46                     | 0.25   | -0.07 | 0.61 | 1.10x10 <sup>-3</sup>  | >0.05                 | 35                    | 0.45   | 0.07  | 0.61 | 1.09x10 <sup>-4</sup> | >0.05                 |
| FGF-23  | 41                     | 0.14   | 0.01  | 0.34 | 1.32x10 <sup>-3</sup>  | >0.05                 | 31                    | -0.07  | -0.23 | 0.30 | 8.85x10 <sup>-1</sup> | >0.05                 |
| CCL3    | 45                     | 0.31   | -0.02 | 0.85 | 1.60x10 <sup>-3</sup>  | >0.05                 | 35                    | 0.20   | -0.34 | 0.62 | 1.95x10 <sup>-1</sup> | >0.05                 |
| TNFSF14 | 46                     | 0.29   | -0.05 | 0.87 | 1.75x10 <sup>-3</sup>  | >0.05                 | 35                    | 0.09   | -0.61 | 0.62 | 6.68x10 <sup>-1</sup> | >0.05                 |
| HGF     | 45                     | 0.14   | -0.03 | 0.40 | 2.14x10 <sup>-3</sup>  | >0.05                 | 35                    | 0.08   | -0.21 | 0.40 | 6.25x10 <sup>-2</sup> | >0.05                 |
| IL-18   | 46                     | 0.25   | -0.03 | 0.60 | 2.41x10 <sup>-3</sup>  | >0.05                 | 35                    | 0.31   | -0.09 | 0.60 | 5.65x10 <sup>-3</sup> | >0.05                 |
| TRAIL   | 46                     | 0.11   | -0.05 | 0.31 | 2.51x10 <sup>-3</sup>  | >0.05                 | 35                    | 0.17   | -0.05 | 0.25 | 6.74x10 <sup>-2</sup> | >0.05                 |
| CXCL6   | 46                     | 0.16   | -0.05 | 0.39 | 2.61x10 <sup>-3</sup>  | >0.05                 | 35                    | 0.09   | -0.13 | 0.27 | 1.31x10 <sup>-1</sup> | >0.05                 |
| CSF-1   | 46                     | 0.08   | -0.03 | 0.19 | 2.71x10 <sup>-3</sup>  | >0.05                 | 35                    | 0.05   | -0.08 | 0.19 | 1.27x10 <sup>-1</sup> | >0.05                 |
| CCL4    | 45                     | 0.18   | -0.04 | 0.48 | 2.97x10 <sup>-3</sup>  | >0.05                 | 35                    | -0.01  | -0.20 | 0.25 | 9.29x10 <sup>-1</sup> | >0.05                 |
| CD8A    | 46                     | 0.21   | -0.12 | 0.41 | 3.97x10 <sup>-3</sup>  | >0.05                 | 35                    | 0.14   | -0.14 | 0.56 | 1.37x10 <sup>-2</sup> | >0.05                 |
| CCL23   | 46                     | 0.15   | -0.12 | 0.49 | 5.94x10 <sup>-3</sup>  | >0.05                 | 35                    | 0.08   | -0.02 | 0.52 | 3.80x10 <sup>-3</sup> | >0.05                 |
| CD40    | 45                     | 0.13   | -0.02 | 0.41 | 8.51x10 <sup>-3</sup>  | >0.05                 | 35                    | 0.12   | -0.03 | 0.46 | 5.34x10 <sup>-3</sup> | >0.05                 |
| SLAMF1  | 46                     | 0.11   | -0.08 | 0.38 | 9.33x10 <sup>-3</sup>  | >0.05                 | 35                    | 0.08   | -0.22 | 0.30 | 2.65x10 <sup>-1</sup> | >0.05                 |
| uPA     | 46                     | 0.14   | -0.05 | 0.29 | 1.22x10 <sup>-2</sup>  | >0.05                 | 35                    | 0.07   | -0.15 | 0.24 | 1.79x10 <sup>-1</sup> | >0.05                 |
| CXCL5   | 46                     | 0.12   | -0.08 | 0.36 | 1.26x10 <sup>-2</sup>  | >0.05                 | 34                    | 0.13   | 0.04  | 0.26 | 5.01x10 <sup>-4</sup> | >0.05                 |
| TGF-α   | 46                     | 0.27   | -0.09 | 0.66 | 1.62x10 <sup>-2</sup>  | >0.05                 | 35                    | -0.04  | -0.52 | 0.61 | 8.27x10 <sup>-1</sup> | >0.05                 |
| CDCP1   | 45                     | 0.24   | -0.12 | 0.55 | 1.67x10 <sup>-2</sup>  | >0.05                 | 34                    | 0.23   | -0.09 | 0.45 | 1.25x10 <sup>-2</sup> | >0.05                 |
| MCP-4   | 46                     | 0.14   | -0.12 | 0.44 | 2.41x10 <sup>-2</sup>  | >0.05                 | 35                    | 0.02   | -0.27 | 0.24 | 7.90x10 <sup>-1</sup> | >0.05                 |
| IL-17C  | 44                     | 0.14   | -0.08 | 0.42 | 2.94x10 <sup>-2</sup>  | >0.05                 | 35                    | 0.22   | -0.24 | 0.69 | 1.90x10 <sup>-1</sup> | >0.05                 |
| VEGFA   | 46                     | 0.11   | -0.08 | 0.37 | 2.96x10 <sup>-2</sup>  | >0.05                 | 35                    | 0.00   | -0.18 | 0.29 | 4.81x10 <sup>-1</sup> | >0.05                 |

|             |    |       |       |      |                       |       |    |       |       |      |                       |       |
|-------------|----|-------|-------|------|-----------------------|-------|----|-------|-------|------|-----------------------|-------|
| CCL20       | 46 | 0.20  | -0.35 | 0.95 | 3.41x10 <sup>-2</sup> | >0.05 | 35 | 0.32  | -0.45 | 0.95 | 9.02x10 <sup>-2</sup> | >0.05 |
| FGF-21      | 45 | -0.39 | -0.84 | 0.33 | 4.02x10 <sup>-2</sup> | >0.05 | 35 | -0.49 | -0.84 | 0.32 | 6.01x10 <sup>-2</sup> | >0.05 |
| CD244       | 46 | 0.09  | -0.08 | 0.23 | 5.68x10 <sup>-2</sup> | >0.05 | 35 | 0.05  | -0.15 | 0.23 | 3.85x10 <sup>-1</sup> | >0.05 |
| STAMBP      | 46 | 0.27  | -0.25 | 0.80 | 5.68x10 <sup>-2</sup> | >0.05 | 34 | 0.02  | -0.41 | 0.44 | 1.00E+00              | >0.05 |
| MCP-1       | 46 | 0.11  | -0.09 | 0.32 | 6.13x10 <sup>-2</sup> | >0.05 | 35 | -0.11 | -0.43 | 0.30 | 2.07x10 <sup>-1</sup> | >0.05 |
| ST1A1       | 45 | 0.34  | -0.61 | 1.55 | 6.21x10 <sup>-2</sup> | >0.05 | 35 | -0.17 | -0.64 | 0.49 | 3.85x10 <sup>-1</sup> | >0.05 |
| AXIN1       | 46 | 0.27  | -0.40 | 1.19 | 7.30x10 <sup>-2</sup> | >0.05 | 35 | 0.00  | -0.73 | 0.40 | 3.77x10 <sup>-1</sup> | >0.05 |
| IL-18R1     | 45 | 0.11  | -0.13 | 0.30 | 8.21x10 <sup>-2</sup> | >0.05 | 34 | 0.09  | -0.15 | 0.22 | 2.78x10 <sup>-1</sup> | >0.05 |
| SIRT2       | 46 | 0.28  | -0.64 | 1.29 | 8.64x10 <sup>-2</sup> | >0.05 | 34 | 0.12  | -0.50 | 0.74 | 4.36x10 <sup>-1</sup> | >0.05 |
| MCP-2       | 45 | 0.05  | -0.04 | 0.29 | 9.06x10 <sup>-2</sup> | >0.05 | 34 | -0.12 | -0.32 | 0.11 | 9.07x10 <sup>-2</sup> | >0.05 |
| MMP-1       | 43 | 0.06  | -0.12 | 0.21 | 1.09x10 <sup>-1</sup> | >0.05 | 34 | -0.05 | -0.17 | 0.09 | 2.09x10 <sup>-1</sup> | >0.05 |
| SCF         | 45 | -0.05 | -0.28 | 0.09 | 1.12x10 <sup>-1</sup> | >0.05 | 34 | -0.06 | -0.34 | 0.24 | 4.99x10 <sup>-1</sup> | >0.05 |
| ADA         | 45 | 0.06  | -0.15 | 0.34 | 1.31x10 <sup>-1</sup> | >0.05 | 34 | 0.13  | -0.08 | 0.40 | 7.69x10 <sup>-3</sup> | >0.05 |
| CASP-8      | 46 | 0.11  | -0.44 | 0.86 | 1.57x10 <sup>-1</sup> | >0.05 | 35 | 0.15  | -0.40 | 0.68 | 3.77x10 <sup>-1</sup> | >0.05 |
| IL-20RA     | 40 | 0.08  | -0.10 | 0.17 | 1.70x10 <sup>-1</sup> | >0.05 | 31 | -0.03 | -0.19 | 0.17 | 4.68x10 <sup>-1</sup> | >0.05 |
| LAP (TGFB1) | 46 | 0.05  | -0.18 | 0.37 | 1.72x10 <sup>-1</sup> | >0.05 | 35 | 0.08  | -0.13 | 0.27 | 2.13x10 <sup>-1</sup> | >0.05 |
| TRANCE      | 46 | 0.08  | -0.17 | 0.50 | 1.74x10 <sup>-1</sup> | >0.05 | 35 | 0.37  | -0.16 | 0.55 | 3.13x10 <sup>-2</sup> | >0.05 |
| IL-6        | 45 | 0.13  | -0.20 | 0.44 | 1.77x10 <sup>-1</sup> | >0.05 | 35 | -0.14 | -0.91 | 0.33 | 1.58x10 <sup>-1</sup> | >0.05 |
| CST5        | 46 | 0.04  | -0.15 | 0.25 | 1.99x10 <sup>-1</sup> | >0.05 | 35 | 0.08  | -0.11 | 0.23 | 3.59x10 <sup>-1</sup> | >0.05 |
| CCL28       | 46 | 0.04  | -0.16 | 0.29 | 2.28x10 <sup>-1</sup> | >0.05 | 35 | 0.09  | -0.07 | 0.37 | 2.63x10 <sup>-2</sup> | >0.05 |
| 4E-BP1      | 46 | 0.16  | -0.52 | 0.73 | 2.32x10 <sup>-1</sup> | >0.05 | 35 | 0.00  | -0.69 | 1.45 | 6.33x10 <sup>-1</sup> | >0.05 |
| IL-8        | 45 | 0.12  | -0.22 | 0.45 | 2.82x10 <sup>-1</sup> | >0.05 | 35 | 0.06  | -0.42 | 0.76 | 4.91x10 <sup>-1</sup> | >0.05 |
| CX3CL1      | 45 | 0.05  | -0.10 | 0.24 | 3.02x10 <sup>-1</sup> | >0.05 | 35 | 0.15  | -0.16 | 0.48 | 5.57x10 <sup>-2</sup> | >0.05 |
| EN-RAGE     | 46 | 0.17  | -0.52 | 0.72 | 3.02x10 <sup>-1</sup> | >0.05 | 35 | -0.09 | -0.78 | 0.87 | 8.78x10 <sup>-1</sup> | >0.05 |
| CCL11       | 46 | -0.03 | -0.17 | 0.12 | 3.98x10 <sup>-1</sup> | >0.05 | 35 | 0.00  | -0.24 | 0.25 | 9.94x10 <sup>-1</sup> | >0.05 |
| FGF-5       | 46 | -0.04 | -0.14 | 0.08 | 4.04x10 <sup>-1</sup> | >0.05 | 34 | 0.00  | -0.11 | 0.09 | 8.79x10 <sup>-1</sup> | >0.05 |
| DNER        | 45 | -0.03 | -0.14 | 0.10 | 4.07x10 <sup>-1</sup> | >0.05 | 35 | -0.06 | -0.30 | 0.12 | 1.00x10 <sup>-1</sup> | >0.05 |
| IL-7        | 46 | 0.09  | -0.21 | 0.29 | 4.16x10 <sup>-1</sup> | >0.05 | 35 | -0.07 | -0.16 | 0.33 | 8.91x10 <sup>-1</sup> | >0.05 |
| GDNF        | 45 | -0.03 | -0.21 | 0.19 | 4.88x10 <sup>-1</sup> | >0.05 | 32 | 0.05  | -0.18 | 0.20 | 6.38x10 <sup>-1</sup> | >0.05 |
| IL-10RA     | 44 | -0.01 | -0.18 | 0.11 | 5.13x10 <sup>-1</sup> | >0.05 | 34 | 0.05  | -0.09 | 0.20 | 1.79x10 <sup>-1</sup> | >0.05 |
| FGF-19      | 46 | 0.06  | -0.47 | 0.60 | 5.30x10 <sup>-1</sup> | >0.05 | 35 | 0.05  | -0.84 | 0.62 | 7.28x10 <sup>-1</sup> | >0.05 |
| TWEAK       | 46 | 0.03  | -0.17 | 0.23 | 5.30x10 <sup>-1</sup> | >0.05 | 35 | -0.01 | -0.12 | 0.19 | 8.27x10 <sup>-1</sup> | >0.05 |
| LIF-R       | 46 | 0.03  | -0.13 | 0.18 | 6.65x10 <sup>-1</sup> | >0.05 | 35 | 0.02  | -0.10 | 0.29 | 1.68x10 <sup>-1</sup> | >0.05 |
| OPG         | 45 | 0.03  | -0.16 | 0.21 | 7.71x10 <sup>-1</sup> | >0.05 | 35 | -0.07 | -0.26 | 0.16 | 5.01x10 <sup>-1</sup> | >0.05 |
| CCL25       | 46 | 0.02  | -0.18 | 0.16 | 9.14x10 <sup>-1</sup> | >0.05 | 35 | 0.00  | -0.27 | 0.24 | 9.29x10 <sup>-1</sup> | >0.05 |
| NT-3        | 45 | 0.02  | -0.18 | 0.18 | 9.29x10 <sup>-1</sup> | >0.05 | 34 | -0.04 | -0.19 | 0.21 | 6.12x10 <sup>-1</sup> | >0.05 |
| MMP-10      | 46 | 0.03  | -0.36 | 0.32 | 9.91x10 <sup>-1</sup> | >0.05 | 35 | 0.11  | -0.31 | 0.62 | 3.59x10 <sup>-1</sup> | >0.05 |



**Table S4.** Association between ORR and inflammatory proteins changes from baseline at early (2-5 weeks after ICI initiation) and late (5-12 weeks after ICI initiation) follow-up visits. Protein change scores were estimated using Olink data in 46 (27 responders and 19 non-responders) and 35 (24 responders and 11 non-responders) patients with advanced melanoma at early and late follow-up time windows, respectively, and tested for association with ORR using a two-sided Wilcoxon test (p). Median change of log<sub>2</sub>-scaled protein levels, along with the lower (Q1) and upper (Q3) quartiles, are shown. A Wilcoxon empirical p-value (p<sub>emp</sub>) was determined using multivariate permutation.

| Protein | Early time window |        |       |      |                |        |       |       |                           |                       |                  | Late time window |        |       |      |                |        |       |      |                           |                       |                  |
|---------|-------------------|--------|-------|------|----------------|--------|-------|-------|---------------------------|-----------------------|------------------|------------------|--------|-------|------|----------------|--------|-------|------|---------------------------|-----------------------|------------------|
|         | Responders        |        |       |      | Non-Responders |        |       |       | mean log <sub>2</sub> -FC | p                     | p <sub>emp</sub> | Responders       |        |       |      | Non-Responders |        |       |      | mean log <sub>2</sub> -FC | p                     | p <sub>emp</sub> |
|         | N                 | median | Q1    | Q3   | N              | median | Q1    | Q3    |                           |                       |                  | N                | median | Q1    | Q3   | N              | median | Q1    | Q3   |                           |                       |                  |
| CX3CL1  | 26                | 0.13   | 0.02  | 0.35 | 19             | -0.17  | -0.40 | 0.12  | -0.37                     | 1.39x10 <sup>-3</sup> | >0.05            | 24               | 0.26   | -0.08 | 0.56 | 11             | -0.14  | -0.35 | 0.13 | -0.33                     | 3.62x10 <sup>-2</sup> | >0.05            |
| MMP-10  | 27                | 0.17   | -0.08 | 0.36 | 19             | -0.32  | -0.48 | -0.01 | -0.50                     | 7.03x10 <sup>-3</sup> | >0.05            | 24               | 0.18   | -0.25 | 0.65 | 11             | -0.20  | -0.40 | 0.15 | -0.39                     | 2.24x10 <sup>-1</sup> | >0.05            |
| IL-20RA | 24                | 0.14   | 0.06  | 0.21 | 16             | -0.06  | -0.16 | 0.13  | -0.14                     | 4.15x10 <sup>-2</sup> | >0.05            | 20               | -0.01  | -0.12 | 0.09 | 11             | -0.16  | -0.25 | 0.20 | -0.06                     | 8.55x10 <sup>-1</sup> | >0.05            |
| ST1A1   | 27                | -0.14  | -0.56 | 0.80 | 18             | 1.61   | -0.52 | 1.79  | 0.67                      | 5.85x10 <sup>-2</sup> | >0.05            | 24               | -0.25  | -1.09 | 0.48 | 11             | -0.17  | -0.27 | 0.55 | 0.36                      | 3.70x10 <sup>-1</sup> | >0.05            |
| MCP-4   | 27                | 0.25   | 0.02  | 0.45 | 19             | -0.07  | -0.22 | 0.40  | -0.27                     | 6.70x10 <sup>-2</sup> | >0.05            | 24               | -0.01  | -0.33 | 0.27 | 11             | 0.03   | -0.15 | 0.20 | 0.06                      | 9.03x10 <sup>-1</sup> | >0.05            |
| CCL25   | 27                | 0.06   | -0.09 | 0.19 | 19             | 0.00   | -0.35 | 0.08  | -0.22                     | 8.18x10 <sup>-2</sup> | >0.05            | 24               | 0.08   | -0.22 | 0.28 | 11             | -0.11  | -0.31 | 0.13 | -0.09                     | 3.90x10 <sup>-1</sup> | >0.05            |
| SCF     | 26                | 0.02   | -0.18 | 0.08 | 19             | -0.22  | -0.40 | 0.09  | -0.17                     | 1.11x10 <sup>-1</sup> | >0.05            | 23               | -0.04  | -0.24 | 0.22 | 11             | -0.17  | -0.42 | 0.35 | 0.17                      | 9.71x10 <sup>-1</sup> | >0.05            |
| IL-7    | 27                | 0.23   | -0.15 | 0.32 | 19             | -0.08  | -0.18 | 0.09  | -0.13                     | 1.25x10 <sup>-1</sup> | >0.05            | 24               | -0.07  | -0.15 | 0.44 | 11             | -0.07  | -0.18 | 0.10 | -0.14                     | 6.62x10 <sup>-1</sup> | >0.05            |
| DNER    | 26                | 0.01   | -0.09 | 0.11 | 19             | -0.09  | -0.32 | 0.06  | -0.13                     | 1.27x10 <sup>-1</sup> | >0.05            | 24               | -0.04  | -0.30 | 0.14 | 11             | -0.18  | -0.27 | 0.04 | -0.03                     | 5.87x10 <sup>-1</sup> | >0.05            |
| CD244   | 27                | 0.13   | 0.00  | 0.18 | 19             | 0.00   | -0.22 | 0.27  | -0.11                     | 1.36x10 <sup>-1</sup> | >0.05            | 24               | 0.05   | -0.16 | 0.26 | 11             | 0.08   | -0.12 | 0.14 | 0.05                      | 9.30x10 <sup>-1</sup> | >0.05            |
| SIRT2   | 27                | 0.16   | -0.61 | 0.76 | 19             | 1.09   | -0.74 | 1.68  | 0.59                      | 1.42x10 <sup>-1</sup> | >0.05            | 23               | -0.14  | -0.53 | 0.63 | 11             | 0.46   | 0.23  | 1.21 | 0.56                      | 1.14x10 <sup>-1</sup> | >0.05            |
| FGF-23  | 25                | 0.10   | -0.12 | 0.24 | 16             | 0.17   | 0.07  | 0.35  | 0.13                      | 1.47x10 <sup>-1</sup> | >0.05            | 20               | -0.09  | -0.34 | 0.30 | 11             | -0.04  | -0.11 | 0.25 | 0.07                      | 6.40x10 <sup>-1</sup> | >0.05            |
| TNFSF14 | 27                | 0.19   | -0.10 | 0.62 | 19             | 0.68   | 0.12  | 1.20  | 0.32                      | 1.55x10 <sup>-1</sup> | >0.05            | 24               | 0.10   | -0.45 | 0.69 | 11             | 0.06   | -0.61 | 0.54 | 0.00                      | 8.75x10 <sup>-1</sup> | >0.05            |
| CD6     | 27                | 0.29   | 0.01  | 0.63 | 19             | 0.10   | -0.18 | 0.47  | -0.27                     | 1.68x10 <sup>-1</sup> | >0.05            | 24               | 0.49   | 0.08  | 0.62 | 11             | 0.22   | 0.02  | 0.60 | -0.07                     | 7.13x10 <sup>-1</sup> | >0.05            |
| AXIN1   | 27                | 0.23   | -0.33 | 0.56 | 19             | 1.00   | -0.52 | 1.55  | 0.63                      | 1.75x10 <sup>-1</sup> | >0.05            | 24               | -0.12  | -0.88 | 0.39 | 11             | 0.03   | -0.45 | 0.43 | 0.57                      | 4.30x10 <sup>-1</sup> | >0.05            |
| EN-RAGE | 27                | -0.03  | -0.50 | 0.40 | 19             | 0.47   | -0.46 | 1.24  | 0.37                      | 1.83x10 <sup>-1</sup> | >0.05            | 24               | -0.08  | -0.47 | 0.54 | 11             | -0.13  | -0.89 | 1.01 | -0.09                     | 7.40x10 <sup>-1</sup> | >0.05            |
| IL-10   | 27                | 0.54   | 0.10  | 1.02 | 19             | 0.65   | 0.52  | 1.15  | 0.14                      | 1.90x10 <sup>-1</sup> | >0.05            | 24               | 0.33   | 0.07  | 0.87 | 11             | 0.64   | 0.37  | 1.19 | 0.39                      | 1.98x10 <sup>-1</sup> | >0.05            |
| MCP-1   | 27                | 0.17   | -0.04 | 0.35 | 19             | 0.01   | -0.30 | 0.29  | -0.20                     | 1.90x10 <sup>-1</sup> | >0.05            | 24               | -0.11  | -0.40 | 0.14 | 11             | -0.16  | -0.35 | 0.41 | 0.06                      | 7.93x10 <sup>-1</sup> | >0.05            |
| CASP-8  | 27                | 0.00   | -0.43 | 0.32 | 19             | 0.67   | -0.40 | 1.01  | 0.35                      | 1.98x10 <sup>-1</sup> | >0.05            | 24               | 0.10   | -0.37 | 0.53 | 11             | 0.26   | -0.34 | 0.80 | 0.07                      | 7.40x10 <sup>-1</sup> | >0.05            |
| FGF-19  | 27                | 0.09   | -0.41 | 0.98 | 19             | 0.03   | -0.63 | 0.37  | -0.46                     | 2.14x10 <sup>-1</sup> | >0.05            | 24               | 0.08   | -0.59 | 0.61 | 11             | -0.12  | -0.86 | 0.53 | 0.19                      | 9.30x10 <sup>-1</sup> | >0.05            |
| OSM     | 27                | 0.40   | 0.15  | 0.64 | 19             | 0.74   | 0.21  | 1.12  | 0.14                      | 2.14x10 <sup>-1</sup> | >0.05            | 24               | 0.23   | -0.42 | 0.80 | 11             | 0.04   | -0.81 | 0.45 | -0.44                     | 2.99x10 <sup>-1</sup> | >0.05            |
| FGF-21  | 26                | -0.38  | -0.74 | 0.48 | 19             | -0.39  | -1.20 | 0.28  | -0.39                     | 2.21x10 <sup>-1</sup> | >0.05            | 24               | -0.43  | -0.91 | 0.09 | 11             | -0.49  | -0.78 | 0.42 | -0.32                     | 8.20x10 <sup>-1</sup> | >0.05            |
| TNFB    | 27                | 0.27   | 0.14  | 0.35 | 19             | 0.18   | -0.21 | 0.37  | -0.13                     | 2.22x10 <sup>-1</sup> | >0.05            | 24               | 0.27   | -0.01 | 0.39 | 11             | 0.18   | 0.02  | 0.28 | 0.07                      | 7.93x10 <sup>-1</sup> | >0.05            |

|             |    |       |       |      |    |       |       |      |       |                       |       |    |       |       |      |    |       |       |      |       |                       |       |
|-------------|----|-------|-------|------|----|-------|-------|------|-------|-----------------------|-------|----|-------|-------|------|----|-------|-------|------|-------|-----------------------|-------|
| TRANCE      | 27 | 0.15  | -0.10 | 0.50 | 19 | -0.05 | -0.37 | 0.44 | -0.14 | 2.22x10 <sup>-1</sup> | >0.05 | 24 | 0.38  | -0.20 | 0.51 | 11 | 0.31  | -0.04 | 0.60 | 0.27  | 5.63x10 <sup>-1</sup> | >0.05 |
| CST5        | 27 | 0.10  | -0.04 | 0.25 | 19 | -0.03 | -0.19 | 0.23 | -0.08 | 2.31x10 <sup>-1</sup> | >0.05 | 24 | 0.06  | -0.08 | 0.26 | 11 | 0.10  | -0.24 | 0.17 | -0.10 | 5.63x10 <sup>-1</sup> | >0.05 |
| Flt3L       | 27 | 0.32  | 0.05  | 0.49 | 19 | 0.14  | -0.09 | 0.37 | -0.16 | 2.49x10 <sup>-1</sup> | >0.05 | 24 | 0.14  | -0.10 | 0.43 | 11 | -0.13 | -0.33 | 0.31 | -0.04 | 4.72x10 <sup>-1</sup> | >0.05 |
| IL-17C      | 25 | 0.21  | -0.05 | 0.54 | 19 | 0.08  | -0.10 | 0.27 | -0.07 | 2.58x10 <sup>-1</sup> | >0.05 | 24 | 0.22  | -0.30 | 0.68 | 11 | 0.22  | -0.15 | 0.69 | -0.12 | 7.93x10 <sup>-1</sup> | >0.05 |
| NT-3        | 27 | 0.04  | -0.11 | 0.18 | 18 | -0.01 | -0.23 | 0.17 | -0.18 | 2.64x10 <sup>-1</sup> | >0.05 | 23 | -0.04 | -0.17 | 0.14 | 11 | 0.02  | -0.31 | 0.22 | -0.07 | 1.00E+00              | >0.05 |
| IL-15RA     | 26 | 0.22  | 0.10  | 0.34 | 19 | 0.18  | -0.06 | 0.29 | -0.08 | 2.99x10 <sup>-1</sup> | >0.05 | 24 | 0.28  | 0.11  | 0.39 | 11 | 0.13  | 0.02  | 0.28 | -0.09 | 2.83x10 <sup>-1</sup> | >0.05 |
| HGF         | 26 | 0.12  | -0.04 | 0.33 | 19 | 0.23  | -0.02 | 0.59 | 0.07  | 3.10x10 <sup>-1</sup> | >0.05 | 24 | 0.11  | -0.20 | 0.51 | 11 | 0.01  | -0.17 | 0.30 | -0.26 | 2.68x10 <sup>-1</sup> | >0.05 |
| FGF-5       | 27 | 0.00  | -0.13 | 0.13 | 19 | -0.06 | -0.16 | 0.03 | -0.05 | 3.30x10 <sup>-1</sup> | >0.05 | 23 | -0.02 | -0.10 | 0.07 | 11 | 0.03  | -0.12 | 0.11 | -0.04 | 1.00E+00              | >0.05 |
| LAP (TGFB1) | 27 | 0.10  | -0.14 | 0.39 | 19 | -0.04 | -0.22 | 0.22 | -0.10 | 3.32x10 <sup>-1</sup> | >0.05 | 24 | 0.09  | -0.13 | 0.31 | 11 | 0.05  | -0.13 | 0.24 | -0.04 | 8.75x10 <sup>-1</sup> | >0.05 |
| CCL11       | 27 | 0.01  | -0.16 | 0.12 | 19 | -0.07 | -0.34 | 0.16 | -0.08 | 3.52x10 <sup>-1</sup> | >0.05 | 24 | 0.02  | -0.21 | 0.22 | 11 | -0.06 | -0.37 | 0.28 | -0.02 | 6.62x10 <sup>-1</sup> | >0.05 |
| CXCL1       | 27 | 0.13  | -0.03 | 0.28 | 19 | 0.30  | 0.02  | 0.48 | 0.05  | 3.52x10 <sup>-1</sup> | >0.05 | 24 | 0.15  | -0.22 | 0.35 | 11 | 0.11  | -0.11 | 0.33 | -0.06 | 9.58x10 <sup>-1</sup> | >0.05 |
| STAMBP      | 27 | 0.17  | -0.25 | 0.63 | 19 | 0.56  | -0.41 | 0.93 | 0.22  | 3.52x10 <sup>-1</sup> | >0.05 | 23 | -0.01 | -0.50 | 0.42 | 11 | 0.11  | -0.04 | 0.72 | 0.44  | 2.14x10 <sup>-1</sup> | >0.05 |
| TRAIL       | 27 | 0.04  | -0.06 | 0.27 | 19 | 0.11  | -0.02 | 0.36 | 0.07  | 3.52x10 <sup>-1</sup> | >0.05 | 24 | 0.13  | -0.10 | 0.21 | 11 | 0.18  | 0.09  | 0.31 | 0.21  | 1.42x10 <sup>-1</sup> | >0.05 |
| IL-6        | 26 | -0.02 | -0.30 | 0.34 | 19 | 0.31  | -0.12 | 0.52 | -0.24 | 3.68x10 <sup>-1</sup> | >0.05 | 24 | -0.18 | -0.98 | 0.18 | 11 | 0.01  | -0.82 | 0.62 | -0.20 | 8.47x10 <sup>-1</sup> | >0.05 |
| CDCP1       | 26 | 0.20  | -0.08 | 0.42 | 19 | 0.40  | -0.14 | 0.63 | 0.11  | 3.93x10 <sup>-1</sup> | >0.05 | 23 | 0.14  | -0.15 | 0.44 | 11 | 0.39  | -0.03 | 0.58 | 0.28  | 2.28x10 <sup>-1</sup> | >0.05 |
| 4E-BP1      | 27 | 0.12  | -0.64 | 0.56 | 19 | 0.19  | -0.12 | 1.34 | 0.47  | 4.00x10 <sup>-1</sup> | >0.05 | 24 | -0.10 | -0.77 | 0.54 | 11 | 1.49  | -0.50 | 1.98 | 1.07  | 1.07x10 <sup>-1</sup> | >0.05 |
| CCL3        | 26 | 0.25  | 0.00  | 0.61 | 19 | 0.52  | -0.06 | 1.18 | 0.14  | 4.05x10 <sup>-1</sup> | >0.05 | 24 | 0.21  | -0.18 | 0.50 | 11 | 0.20  | -0.72 | 0.83 | -0.02 | 9.86x10 <sup>-1</sup> | >0.05 |
| CD5         | 27 | 0.30  | 0.10  | 0.53 | 19 | 0.19  | 0.04  | 0.49 | -0.14 | 4.52x10 <sup>-1</sup> | >0.05 | 24 | 0.39  | 0.07  | 0.60 | 11 | 0.25  | 0.14  | 0.51 | -0.06 | 7.93x10 <sup>-1</sup> | >0.05 |
| MCP-2       | 26 | 0.07  | -0.02 | 0.28 | 19 | 0.01  | -0.14 | 0.23 | -0.06 | 4.59x10 <sup>-1</sup> | >0.05 | 23 | -0.12 | -0.27 | 0.12 | 11 | -0.18 | -0.40 | 0.11 | -0.09 | 4.68x10 <sup>-1</sup> | >0.05 |
| CXCL5       | 27 | 0.09  | -0.07 | 0.27 | 19 | 0.20  | -0.16 | 0.46 | 0.15  | 4.79x10 <sup>-1</sup> | >0.05 | 23 | 0.12  | 0.05  | 0.24 | 11 | 0.16  | 0.03  | 0.36 | 0.00  | 6.37x10 <sup>-1</sup> | >0.05 |
| CCL19       | 27 | 0.39  | 0.21  | 0.96 | 19 | 0.69  | 0.21  | 1.23 | -0.06 | 5.07x10 <sup>-1</sup> | >0.05 | 24 | 0.20  | -0.25 | 0.88 | 11 | 0.35  | -0.01 | 0.83 | 0.06  | 7.93x10 <sup>-1</sup> | >0.05 |
| uPA         | 27 | 0.12  | -0.03 | 0.31 | 19 | 0.19  | -0.12 | 0.28 | -0.07 | 5.51x10 <sup>-1</sup> | >0.05 | 24 | 0.05  | -0.15 | 0.23 | 11 | 0.09  | -0.11 | 0.27 | 0.07  | 5.87x10 <sup>-1</sup> | >0.05 |
| TWEAK       | 27 | 0.04  | -0.13 | 0.26 | 19 | 0.00  | -0.19 | 0.19 | -0.09 | 5.65x10 <sup>-1</sup> | >0.05 | 24 | -0.03 | -0.13 | 0.19 | 11 | -0.01 | -0.08 | 0.19 | 0.09  | 7.66x10 <sup>-1</sup> | >0.05 |
| IL-8        | 26 | 0.06  | -0.24 | 0.42 | 19 | 0.22  | -0.09 | 0.43 | 0.06  | 5.77x10 <sup>-1</sup> | >0.05 | 24 | 0.04  | -0.32 | 0.66 | 11 | 0.18  | -0.51 | 0.94 | 0.04  | 8.75x10 <sup>-1</sup> | >0.05 |
| CCL28       | 27 | 0.10  | -0.12 | 0.26 | 19 | 0.00  | -0.17 | 0.29 | -0.16 | 6.27x10 <sup>-1</sup> | >0.05 | 24 | 0.10  | -0.12 | 0.38 | 11 | 0.09  | -0.01 | 0.22 | 0.02  | 6.62x10 <sup>-1</sup> | >0.05 |
| LIF-R       | 27 | 0.03  | -0.10 | 0.17 | 19 | 0.03  | -0.16 | 0.14 | -0.07 | 6.27x10 <sup>-1</sup> | >0.05 | 24 | 0.03  | -0.08 | 0.32 | 11 | -0.01 | -0.18 | 0.18 | -0.06 | 6.12x10 <sup>-1</sup> | >0.05 |
| CCL20       | 27 | 0.13  | -0.19 | 0.79 | 19 | 0.47  | -0.53 | 0.98 | -0.32 | 6.75x10 <sup>-1</sup> | >0.05 | 24 | 0.32  | -0.43 | 1.02 | 11 | 0.39  | -0.30 | 0.60 | -0.33 | 8.20x10 <sup>-1</sup> | >0.05 |
| CSF-1       | 27 | 0.07  | 0.00  | 0.14 | 19 | 0.15  | -0.07 | 0.24 | 0.00  | 7.24x10 <sup>-1</sup> | >0.05 | 24 | 0.05  | -0.07 | 0.20 | 11 | 0.07  | -0.12 | 0.17 | -0.07 | 6.62x10 <sup>-1</sup> | >0.05 |
| IL-18       | 27 | 0.25  | 0.03  | 0.59 | 19 | 0.31  | -0.12 | 0.59 | -0.18 | 7.24x10 <sup>-1</sup> | >0.05 | 24 | 0.31  | 0.01  | 0.56 | 11 | 0.41  | -0.16 | 0.60 | -0.30 | 9.30x10 <sup>-1</sup> | >0.05 |
| CD40        | 26 | 0.16  | 0.06  | 0.28 | 19 | 0.09  | -0.22 | 0.46 | 0.00  | 7.24x10 <sup>-1</sup> | >0.05 | 24 | 0.11  | -0.03 | 0.45 | 11 | 0.20  | -0.03 | 0.37 | 0.02  | 9.30x10 <sup>-1</sup> | >0.05 |

|               |    |       |       |      |    |       |       |      |       |                       |       |    |       |       |      |    |       |       |      |       |                       |       |
|---------------|----|-------|-------|------|----|-------|-------|------|-------|-----------------------|-------|----|-------|-------|------|----|-------|-------|------|-------|-----------------------|-------|
| IL-10RA       | 26 | -0.01 | -0.15 | 0.12 | 18 | -0.04 | -0.23 | 0.09 | -0.02 | 7.32x10 <sup>-1</sup> | >0.05 | 23 | 0.06  | -0.12 | 0.20 | 11 | 0.05  | -0.02 | 0.18 | -0.05 | 9.13x10 <sup>-1</sup> | >0.05 |
| IL-18R1       | 26 | 0.11  | -0.10 | 0.32 | 19 | 0.05  | -0.21 | 0.29 | -0.08 | 7.42x10 <sup>-1</sup> | >0.05 | 23 | 0.09  | -0.19 | 0.25 | 11 | 0.09  | -0.14 | 0.12 | 0.03  | 8.85x10 <sup>-1</sup> | >0.05 |
| CXCL6         | 27 | 0.16  | -0.05 | 0.32 | 19 | 0.20  | -0.08 | 0.45 | -0.02 | 7.57x10 <sup>-1</sup> | >0.05 | 24 | 0.08  | -0.16 | 0.29 | 11 | 0.09  | -0.05 | 0.24 | 0.03  | 6.12x10 <sup>-1</sup> | >0.05 |
| CXCL11        | 27 | 0.67  | 0.21  | 1.10 | 19 | 0.74  | 0.25  | 1.71 | -0.03 | 7.74x10 <sup>-1</sup> | >0.05 | 24 | 0.43  | 0.18  | 1.30 | 11 | 1.10  | 0.21  | 1.27 | 0.11  | 6.87x10 <sup>-1</sup> | >0.05 |
| TNF           | 26 | 0.28  | 0.10  | 0.70 | 19 | 0.37  | -0.18 | 1.02 | -0.07 | 7.76x10 <sup>-1</sup> | >0.05 | 24 | 0.08  | -0.22 | 0.58 | 11 | 0.54  | 0.15  | 0.77 | 0.16  | 3.52x10 <sup>-1</sup> | >0.05 |
| IL-10RB       | 26 | 0.08  | -0.01 | 0.19 | 18 | 0.15  | -0.01 | 0.19 | 0.01  | 7.86x10 <sup>-1</sup> | >0.05 | 24 | 0.06  | -0.02 | 0.21 | 10 | 0.14  | -0.05 | 0.17 | -0.02 | 8.67x10 <sup>-1</sup> | >0.05 |
| IL-17A        | 26 | 0.36  | 0.08  | 0.54 | 18 | 0.40  | 0.10  | 0.67 | -0.12 | 7.86x10 <sup>-1</sup> | >0.05 | 23 | 0.31  | -0.10 | 0.60 | 10 | 0.26  | -0.18 | 0.84 | -0.43 | 9.54x10 <sup>-1</sup> | >0.05 |
| CCL4          | 26 | 0.16  | 0.00  | 0.45 | 19 | 0.18  | -0.15 | 0.77 | 0.00  | 7.94x10 <sup>-1</sup> | >0.05 | 24 | -0.01 | -0.15 | 0.33 | 11 | -0.12 | -0.26 | 0.21 | -0.13 | 5.63x10 <sup>-1</sup> | >0.05 |
| TNFRSF9       | 26 | 0.41  | 0.27  | 0.74 | 19 | 0.53  | 0.23  | 0.78 | 0.08  | 7.94x10 <sup>-1</sup> | >0.05 | 24 | 0.47  | 0.10  | 0.71 | 11 | 0.45  | 0.36  | 0.67 | 0.08  | 4.72x10 <sup>-1</sup> | >0.05 |
| CD8A          | 27 | 0.21  | -0.07 | 0.39 | 19 | 0.13  | -0.18 | 0.62 | 0.12  | 8.08x10 <sup>-1</sup> | >0.05 | 24 | 0.17  | -0.11 | 0.55 | 11 | 0.06  | -0.08 | 0.62 | 0.04  | 9.58x10 <sup>-1</sup> | >0.05 |
| CXCL10        | 27 | 0.72  | 0.20  | 1.42 | 19 | 0.83  | 0.22  | 1.53 | -0.35 | 8.08x10 <sup>-1</sup> | >0.05 | 24 | 0.70  | 0.20  | 1.49 | 11 | 0.71  | 0.28  | 1.55 | 0.02  | 8.47x10 <sup>-1</sup> | >0.05 |
| MMP-1         | 25 | 0.10  | -0.12 | 0.22 | 18 | -0.01 | -0.11 | 0.19 | 0.05  | 8.33x10 <sup>-1</sup> | >0.05 | 23 | -0.09 | -0.22 | 0.05 | 11 | 0.05  | -0.09 | 0.12 | 0.16  | 2.01x10 <sup>-1</sup> | >0.05 |
| SLAMF1        | 27 | 0.24  | -0.13 | 0.38 | 19 | 0.09  | -0.04 | 0.41 | 0.00  | 8.42x10 <sup>-1</sup> | >0.05 | 24 | 0.09  | -0.21 | 0.24 | 11 | 0.06  | -0.25 | 0.41 | -0.03 | 9.58x10 <sup>-1</sup> | >0.05 |
| IL-12B        | 27 | 0.41  | 0.18  | 0.71 | 19 | 0.42  | -0.08 | 0.79 | -0.09 | 8.77x10 <sup>-1</sup> | >0.05 | 24 | 0.26  | -0.15 | 0.67 | 11 | 0.52  | 0.22  | 0.97 | 0.33  | 1.74x10 <sup>-1</sup> | >0.05 |
| TGF- $\alpha$ | 27 | 0.24  | -0.15 | 0.65 | 19 | 0.29  | -0.02 | 0.63 | -0.03 | 8.77x10 <sup>-1</sup> | >0.05 | 24 | 0.13  | -0.44 | 0.66 | 11 | -0.06 | -0.52 | 0.27 | -0.22 | 5.17x10 <sup>-1</sup> | >0.05 |
| PD-L1         | 27 | 0.21  | -0.03 | 0.48 | 19 | 0.27  | -0.14 | 0.66 | -0.06 | 9.12x10 <sup>-1</sup> | >0.05 | 24 | 0.16  | -0.03 | 0.45 | 11 | 0.11  | -0.05 | 0.29 | -0.13 | 5.40x10 <sup>-1</sup> | >0.05 |
| CXCL9         | 27 | 0.90  | 0.42  | 1.82 | 19 | 1.17  | 0.31  | 1.88 | -0.29 | 9.30x10 <sup>-1</sup> | >0.05 | 24 | 0.88  | 0.40  | 1.78 | 11 | 1.49  | 0.91  | 1.96 | 0.05  | 4.30x10 <sup>-1</sup> | >0.05 |
| VEGFA         | 27 | 0.11  | -0.06 | 0.35 | 19 | 0.11  | -0.17 | 0.50 | 0.01  | 9.47x10 <sup>-1</sup> | >0.05 | 24 | 0.05  | -0.16 | 0.32 | 11 | -0.09 | -0.26 | 0.08 | -0.12 | 2.38x10 <sup>-1</sup> | >0.05 |
| GDNF          | 26 | -0.05 | -0.17 | 0.09 | 19 | -0.01 | -0.32 | 0.20 | -0.07 | 9.55x10 <sup>-1</sup> | >0.05 | 22 | 0.16  | -0.10 | 0.25 | 10 | -0.19 | -0.37 | 0.01 | -0.23 | 4.28x10 <sup>-2</sup> | >0.05 |
| CCL23         | 27 | 0.17  | -0.11 | 0.50 | 19 | 0.13  | -0.11 | 0.49 | -0.01 | 9.65x10 <sup>-1</sup> | >0.05 | 24 | 0.12  | -0.02 | 0.47 | 11 | 0.02  | -0.12 | 0.60 | -0.05 | 8.20x10 <sup>-1</sup> | >0.05 |
| MCP-3         | 27 | 0.31  | 0.06  | 0.82 | 19 | 0.50  | 0.10  | 0.72 | -0.18 | 9.65x10 <sup>-1</sup> | >0.05 | 24 | 0.12  | -0.28 | 0.57 | 11 | 0.12  | -0.16 | 0.74 | 0.03  | 8.47x10 <sup>-1</sup> | >0.05 |
| IFN- $\gamma$ | 27 | 1.01  | 0.13  | 1.61 | 19 | 0.86  | 0.06  | 1.93 | -0.15 | 9.82x10 <sup>-1</sup> | >0.05 | 24 | 0.49  | -0.26 | 0.77 | 11 | -0.19 | -1.36 | 1.45 | -0.38 | 7.66x10 <sup>-1</sup> | >0.05 |
| ADA           | 26 | 0.10  | -0.08 | 0.21 | 19 | 0.05  | -0.17 | 0.40 | 0.01  | 9.91x10 <sup>-1</sup> | >0.05 | 23 | 0.17  | -0.05 | 0.40 | 11 | 0.10  | -0.13 | 0.44 | 0.07  | 9.71x10 <sup>-1</sup> | >0.05 |
| OPG           | 26 | 0.03  | -0.14 | 0.18 | 19 | 0.04  | -0.28 | 0.22 | -0.01 | 9.91x10 <sup>-1</sup> | >0.05 | 24 | -0.06 | -0.27 | 0.34 | 11 | -0.08 | -0.13 | 0.02 | -0.16 | 6.36x10 <sup>-1</sup> | >0.05 |

**Table S5.** Association between ORR and serum levels of IL-6, HGF, and MCP-2 at early (2-5 weeks after ICI initiation) and late (5-12 weeks after ICI initiation) follow-up visits. Protein differences between 27 and 24 responders, and 19 and 11 non-responders were assessed using Wilcoxon's test (p) on Olink data at early and late follow-up time windows, respectively. Median, lower (Q1) and upper (Q3) quartiles of log<sub>2</sub>-scaled protein levels among responders and non-responders are shown. A Wilcoxon empirical p-value (p<sub>emp</sub>) was determined using multivariate permutation.

| Protein | window | Responders |        |      |       | Non-Responders |        |      |       | mean log <sub>2</sub> -FC | p                     | p <sub>emp</sub>      |
|---------|--------|------------|--------|------|-------|----------------|--------|------|-------|---------------------------|-----------------------|-----------------------|
|         |        | N          | median | Q1   | Q3    | N              | median | Q1   | Q3    |                           |                       |                       |
| HGF     | early  | 26         | 9.71   | 9.40 | 9.92  | 19             | 10.18  | 9.90 | 10.48 | 0.34                      | 2.75x10 <sup>-3</sup> | 9.40x10 <sup>-3</sup> |
| IL-6    | early  | 27         | 2.84   | 2.40 | 3.71  | 19             | 3.61   | 3.08 | 4.43  | 0.31                      | 2.32x10 <sup>-2</sup> | 4.66x10 <sup>-2</sup> |
| MCP-2   | early  | 27         | 9.76   | 9.46 | 10.23 | 19             | 10.08  | 9.74 | 10.64 | 0.43                      | 3.31x10 <sup>-2</sup> | 3.38x10 <sup>-2</sup> |
| IL-6    | late   | 24         | 2.82   | 2.33 | 3.27  | 11             | 3.65   | 3.26 | 3.87  | 0.68                      | 1.33x10 <sup>-2</sup> | 3.94x10 <sup>-2</sup> |
| MCP-2   | late   | 24         | 9.58   | 9.20 | 10.18 | 11             | 9.97   | 9.67 | 10.62 | 0.50                      | 1.52x10 <sup>-1</sup> | >0.05                 |
| HGF     | late   | 24         | 9.72   | 9.50 | 10.30 | 11             | 9.95   | 9.63 | 10.10 | 0.02                      | 4.72x10 <sup>-1</sup> | >0.05                 |

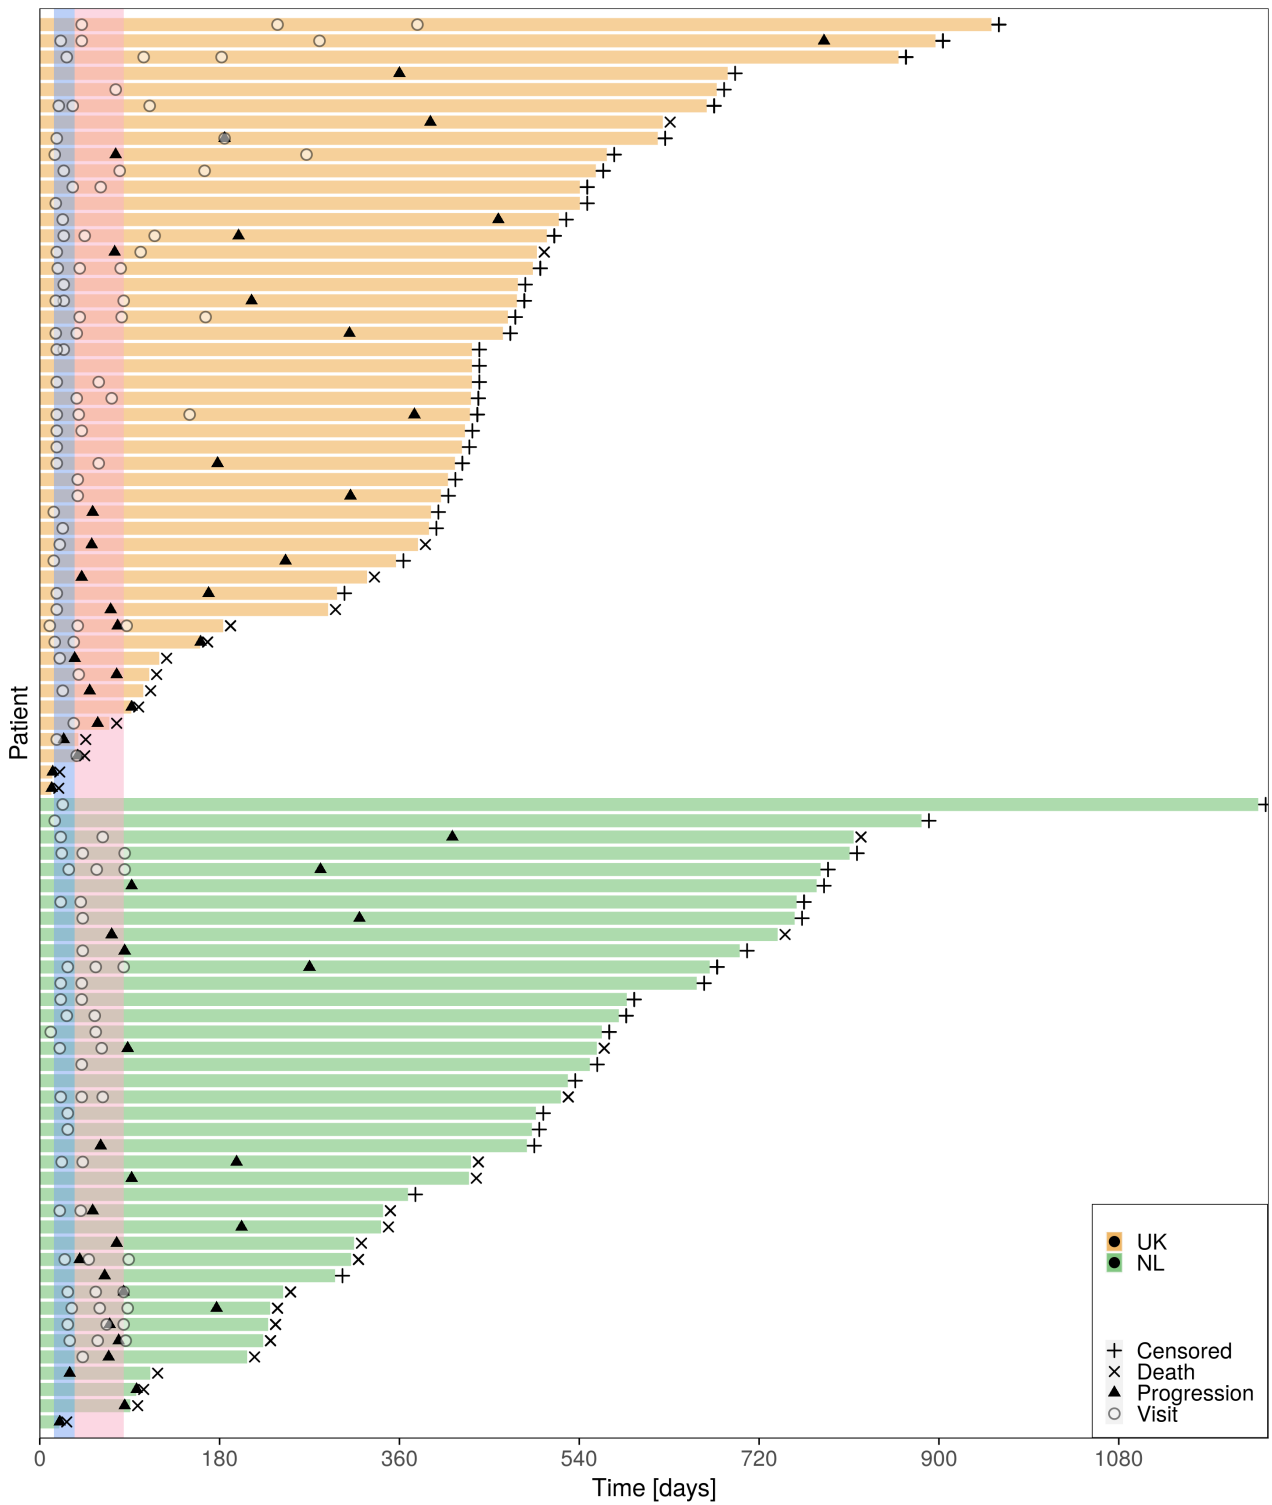

**Figure S1.** Swimmer plot for 87 patients with advanced melanoma. Day 0 indicates the day of ICI treatment initiation. Baseline samples were collected on average seven days before starting ICI. Only visits carried out during the early (blue, 2-5 weeks after ICI initiation) and late (pink, 5-12 weeks after ICI initiation) follow-up time windows were included in the study.

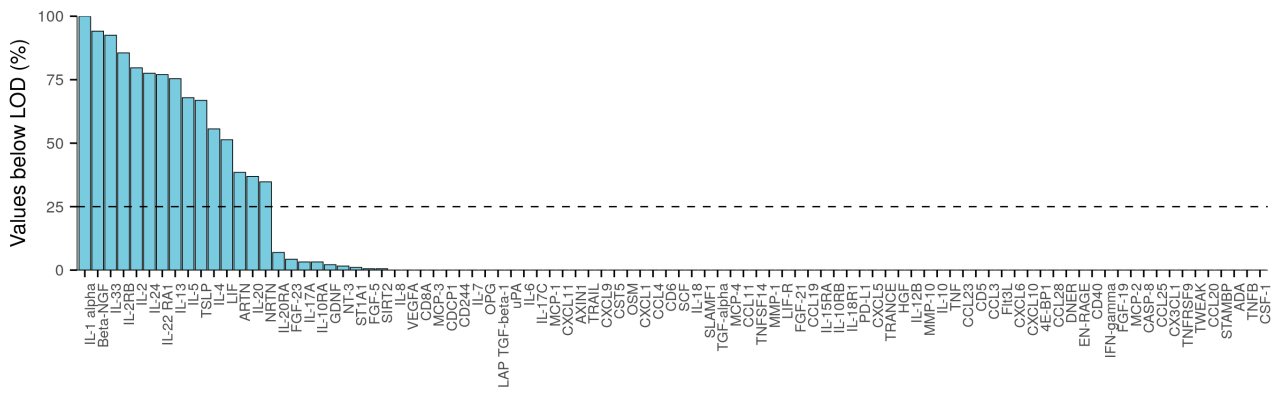

**Figure S2.** Bar plot showing the fraction of values below the limit of detection (LOD) among 92 inflammatory proteins measured in 187 serum samples using the Olink Inflammation panel. Proteins with >25% values below LOD (horizontal dashed line) were discarded.

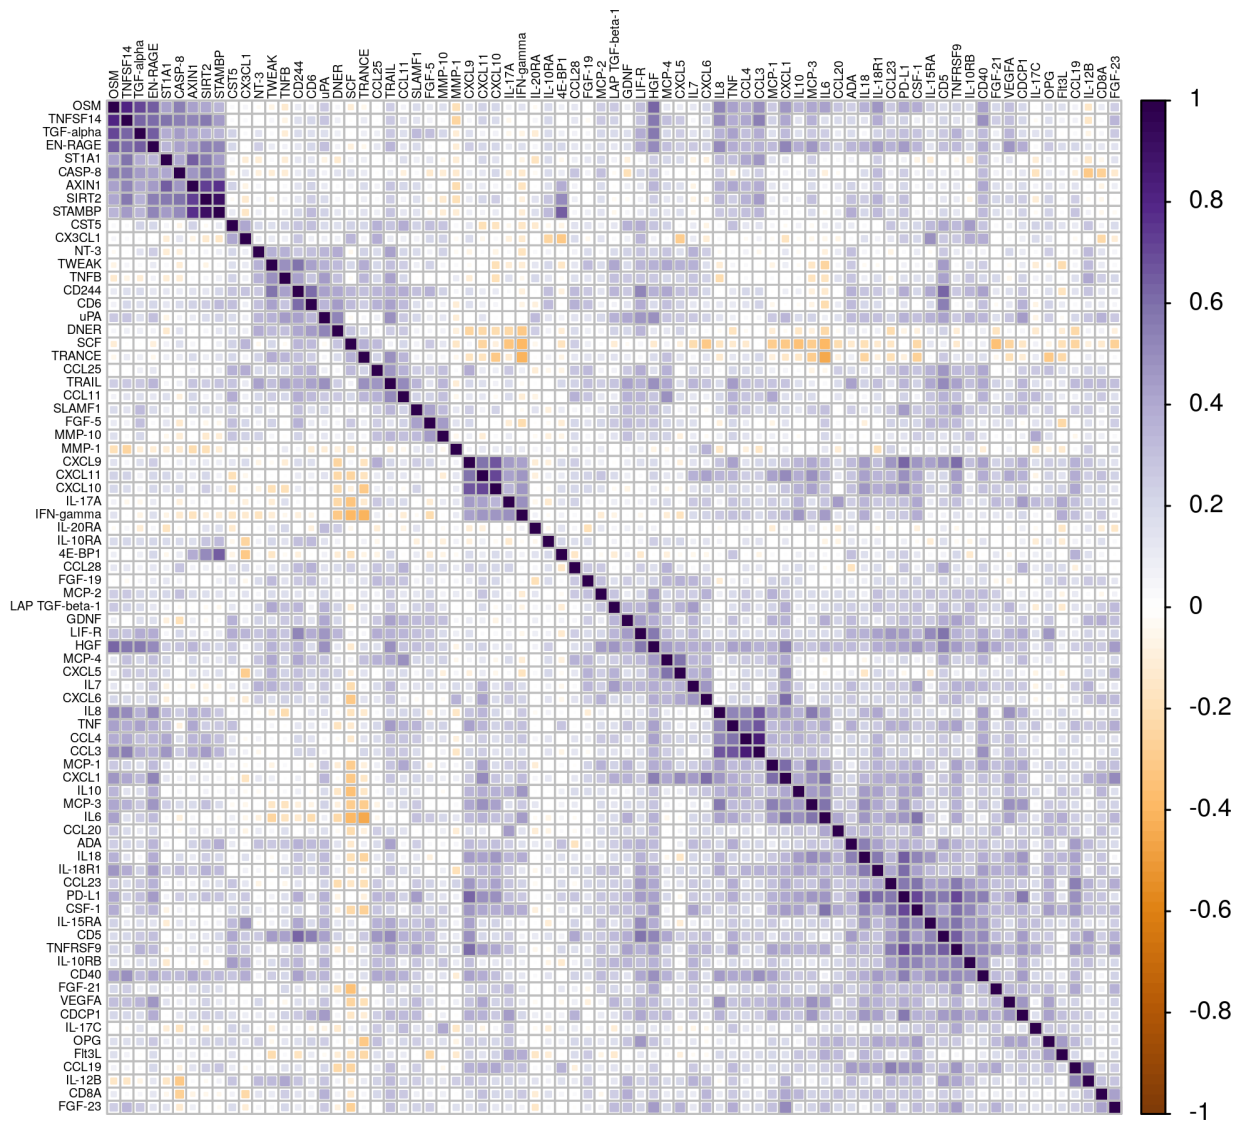

**Figure S3.** Heatmap showing baseline correlation of 77 inflammatory proteins measured using the Olink inflammation panel in serum samples from 87 patients with advanced melanoma.

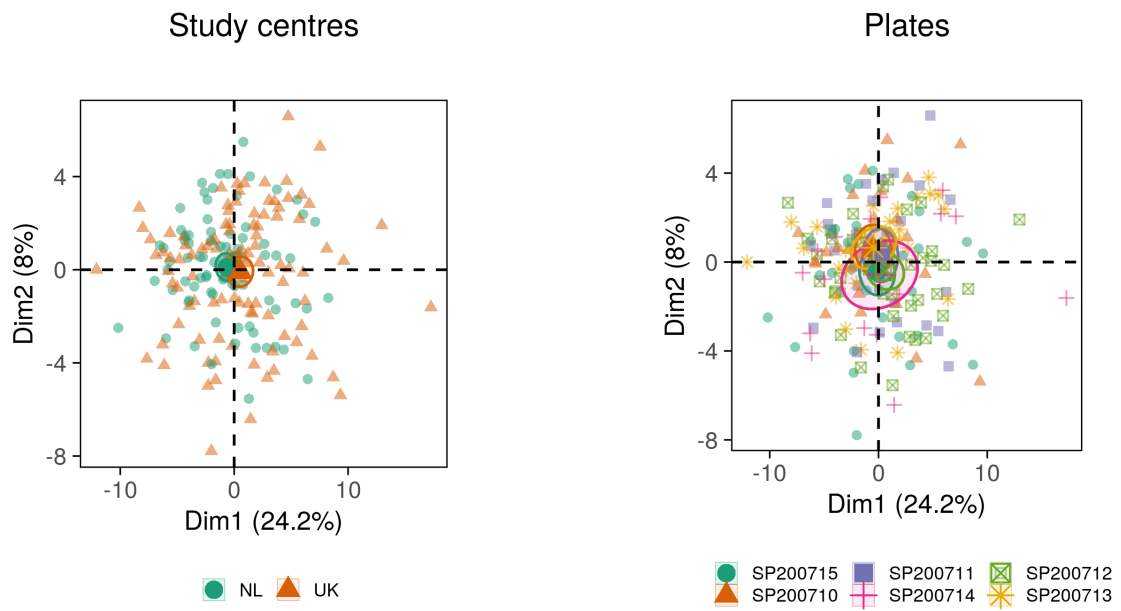

**Figure S4.** Scatterplot of the first two principal components assessed on Olink proteomic data measured in 187 serum samples from 87 patients with advanced melanoma. Individual data points are colour-coded according to the study centre (left panel) or assay plate (right panel).



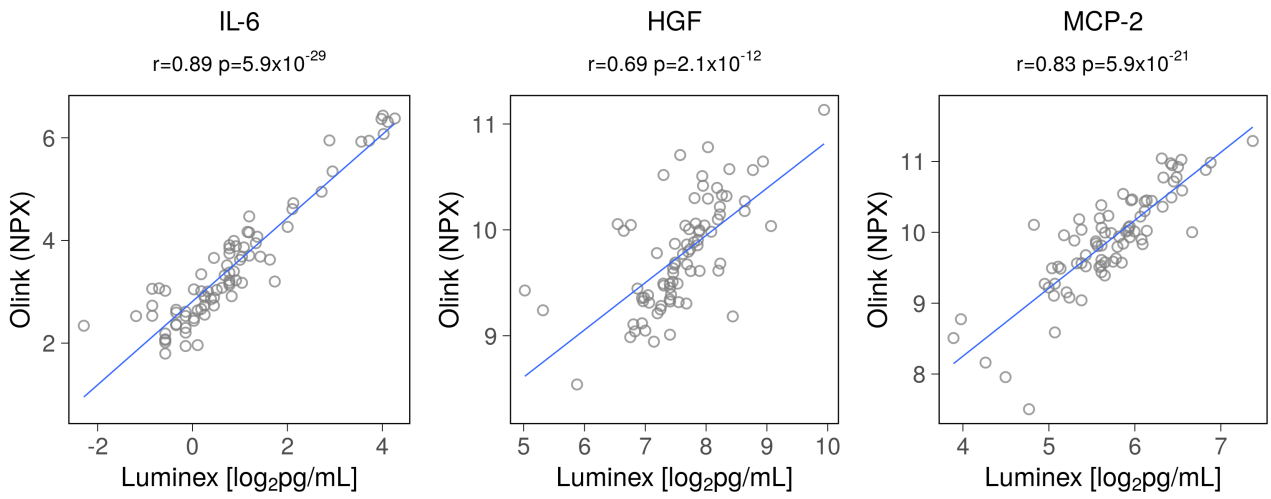

**Figure S5.** Correlation plot of Olink and Luminex data in 81 patients with advanced melanoma. Spearman correlation coefficients and p-values are shown. Olink data is in an arbitrary log<sub>2</sub>-scaled NPX (Normalised Protein eXpression) unit.

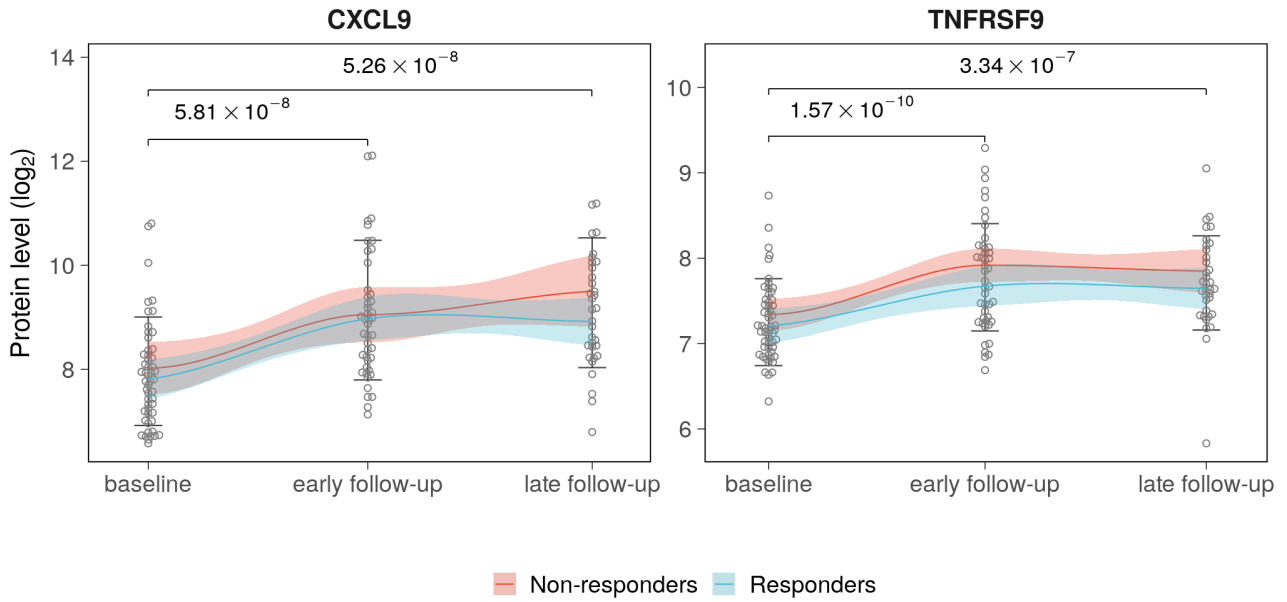

**Figure S6.** Distribution of CXCL9 and TNFRSF9 serum levels in patients with advanced melanoma at baseline and after ICI initiation at early and late follow-up time windows. The early follow-up window comprises follow-up samples collected within 2-5 weeks after starting treatment (average 4 weeks), while the late follow-up window comprises follow-up samples collected within 5-12 weeks after starting treatment (average 8 weeks). P-values were calculated using a two-sided Wilcoxon test for paired data. For responders and non-responders, 95% CIs of the smoothed conditional mean are shown.

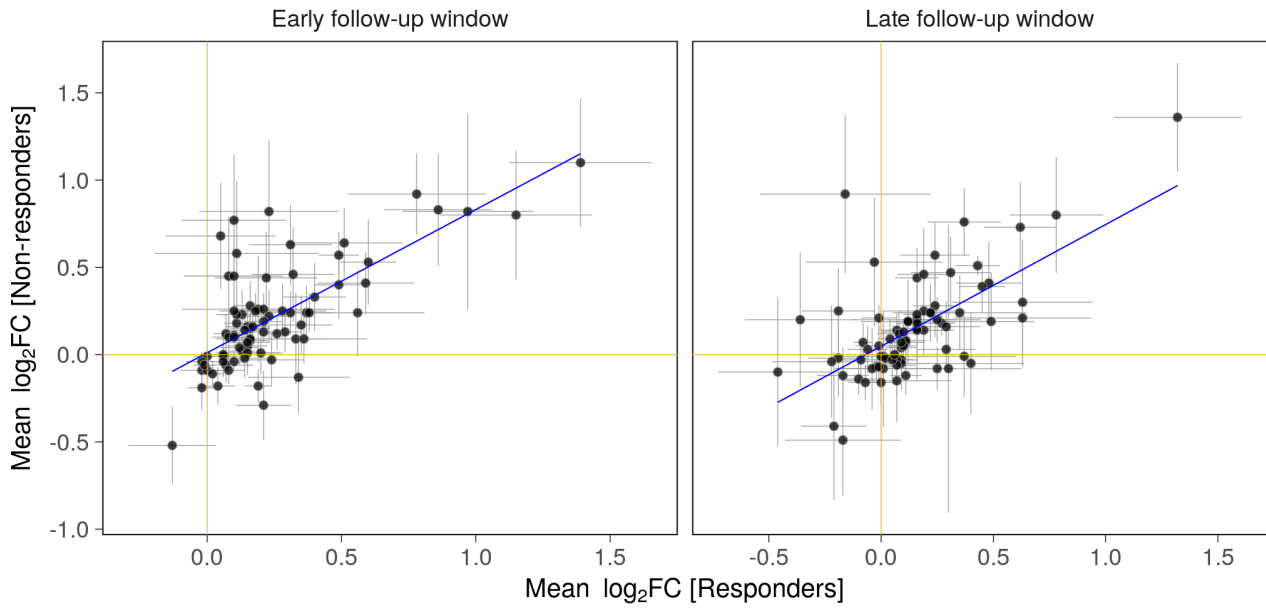

**Figure S7.** Scatterplot showing correlation of change scores of 77 inflammatory proteins from baseline at early and late follow-up visits between responders and non-responders. The early and late follow-up windows comprise follow-up samples collected within 2-5 weeks and 5-12 weeks after ICI initiation, respectively. Each point indicates the mean longitudinal change from baseline to follow-up of  $\log_2$ -scaled protein levels, while lines represent the standard deviation.

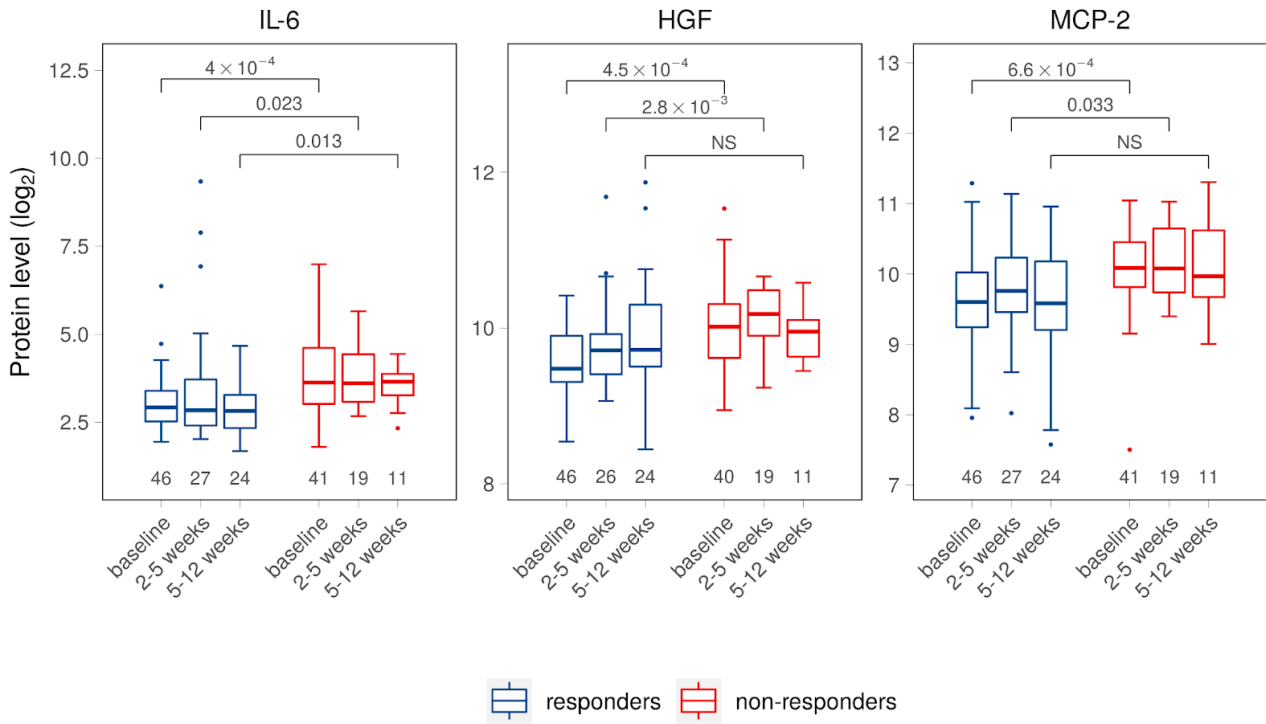

**Figure S8.** Distribution of IL-6, HGF, and MCP-2 serum levels in patients with advanced melanoma at baseline and after ICI initiation at early and late follow-up time windows. The early follow-up window comprises follow-up samples collected within 2-5 weeks after starting treatment, while the late follow-up window comprises follow-up samples collected within 5-12 weeks after starting treatment. P-values were calculated using the Wilcoxon test. Number of patients with serum samples available at each time window is shown. *NS*:  $p > 0.05$ .

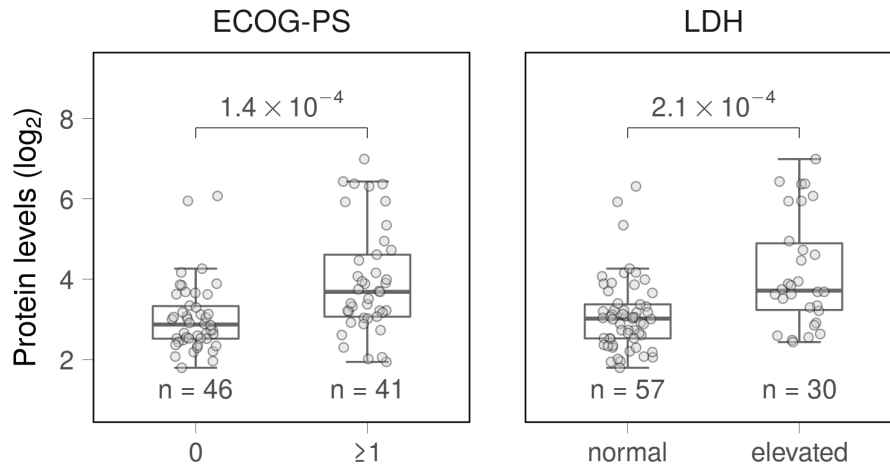

**Figure S9.** Distribution of pre-treatment serum levels of IL-6 (Olink data) according to ECOG-PS (left panel) and LDH levels (right panel).

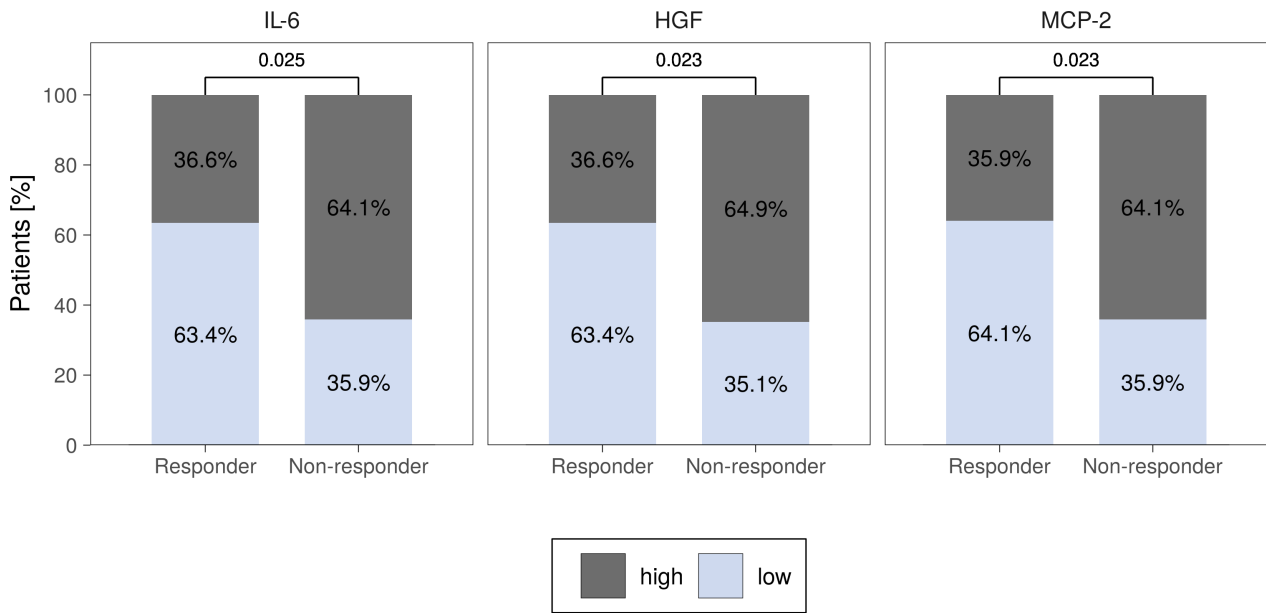

**Figure S10.** Bar plot showing the percentages of patients with advanced melanoma presenting with high (above the median, grey) or low (below the median, light blue) pre-treatment levels of IL-6, HGF, and MCP-2 stratified according to response to ICI. Fisher's p-values are shown.

## References

1. Blackford JU, Salomon RM, Waller NG. Detecting change in biological rhythms: a multivariate permutation test approach to Fourier-transformed data. *Chronobiol Int.* 2009 Feb;26(2):258–81.
